1

2

## Folic acid, but not folate, regulates different stages of neurogenesis in the ventral hippocampus of adult female rats

3

4

Wansu Qiu<sup>1</sup>, Aarthi R. Gobinath<sup>2</sup>, Yanhua Wen<sup>2</sup>, Jehannine Austin<sup>3</sup>, Liisa A.M. Galea<sup>1,2,4\*</sup>

5

6

<sup>1</sup>Graduate Program in Neuroscience, <sup>2</sup>Department of Psychology, and <sup>3</sup>BC Children's Hospital Research Institute, <sup>4</sup>Djavad Mowafaghian Centre for Brain Health

7

8

University of British Columbia

9

10 \*Corresponding Author:

11 2215 Wesbrook Mall

12 Vancouver, BC, Canada

13 V6T 1Z3

14 Liisa.galea@ubc.ca

15

16

17 **ACKNOWLEDGMENTS**

18           The authors would like to thank Lucille Hoover, Nikki Kitay, Robin Richardson,  
19 Christine Ausman, and especially Stephanie E. Lieblich for their assistance and contributions  
20 throughout the experiment. This work was funded by a Canadian Institutes of Health Research  
21 (CIHR) operating grant (MOP142308) to LAMG.

22

23 **ABSTRACT**

24 Folate is an important regulator of hippocampal neurogenesis, and *in utero* spinal cord  
25 development. Both high levels of folic acid and low levels of folate can be harmful to health, as  
26 low levels of folate have been linked to several diseases while high folic acid supplements can  
27 mask a vitamin B12 deficiency. Depressed patients exhibit folate deficiencies, lower levels of  
28 hippocampal neurogenesis, elevated levels of homocysteine, and elevated levels of the stress  
29 hormone, cortisol, which may be inter-related. Here, we are interested in whether different doses  
30 of natural folate or synthetic folic acid diets can influence neurogenesis in the hippocampus,  
31 levels of plasma homocysteine, and serum corticosterone in adult female rats. Adult female  
32 Sprague-Dawley rats underwent dietary interventions for 29 days. Animals were randomly  
33 assigned to six different dietary groups: folate deficient + succinylsulfathiazole (SST), low 5-  
34 methyltetrahydrofolate (5-MTHF), low 5-MTHF + (SST), high 5-MTHF + SST, low folic acid,  
35 and high folic acid. SST was added to a subset of the 5-MTHF diets to eliminate folic acid  
36 production in the gut. Before and after dietary treatment, blood samples were collected for  
37 corticosterone and homocysteine analysis, and brain tissue was collected for neurogenesis  
38 analysis. High folic acid and low 5-MTHF without SST increased the number of immature  
39 neurons (doublecortin-expressing cells) within the ventral hippocampus compared to folate  
40 deficient controls. Low 5-MTHF without SST significantly increased the number of immature  
41 neurons compared to low and high 5-MTHF + SST, indicating that SST interfered with  
42 elevations in neurogenesis. Low folic acid and high 5-MTHF+SST reduced plasma  
43 homocysteine levels compared to controls, but there was no significant effect of diet on serum  
44 corticosterone levels. Low folic acid and high 5-MTHF+SST reduced the number of mature new  
45 neurons in the ventral hippocampus (BrdU/NeuN-positive cells) compared to folate deficient  
46 controls. Overall, folic acid dose-dependently influenced neurogenesis, with low levels  
47 decreasing but high levels increasing, neurogenesis in the ventral hippocampus, suggesting this  
48 region, which is important for regulating stress, is particularly sensitive to folic acid in diets.  
49 Furthermore, the addition of SST negated the effects of 5-MTHF to increase neurogenesis in the  
50 ventral hippocampus.

51

52 **Keywords: dentate gyrus, doublecortin, BrdU, homocysteine, corticosterone, depression**

## 53 1. INTRODUCTION

54 Folate is one of the natural B-complex vitamins, is responsible for one-carbon metabolism<sup>1</sup>,  
55 and converts homocysteine to methionine<sup>2</sup>. This process of reducing homocysteine levels is  
56 crucial for DNA synthesis and overall health. The human body is incapable of making folate  
57 endogenously. Thus, folate must be obtained through diet, such as by eating leafy greens,  
58 legumes, and citrus fruits<sup>3</sup>. Folic acid is a synthetic folate analog and is added to several breads  
59 and cereal products to fortify folate levels within the general population. There are however,  
60 microorganisms within the human gut microbiome that are capable of synthesizing folic acid  
61 from diet<sup>4</sup>. The antibacterial agent, succinylsulfathiazole (SST) is commonly added to folate  
62 diets in pre-clinical research studies to prevent folic acid synthesis through the gut microbiome<sup>5</sup>.  
63 Thus, SST allows for a controlled dose of folate, without the potentially confounding effects of  
64 folic acid, in experimental groups. However, because the addition of SST itself may disrupt  
65 neural processes via the gut microbiome. Particularly, germ free with no commensal gut  
66 microbiome mice show altered neurogenesis<sup>6</sup>, thus one of the goals of the study was to compare  
67 how dietary folate with versus without SST supplementation affected adult female rat  
68 neurogenesis.

69 The world health organization (WHO) recommends the use of folic acid supplements to food  
70 products in part to help prevent fetal neural tube development defects during embryonic  
71 development<sup>7,8</sup>. However, a number of countries have not complied with the WHO  
72 recommendations or have discontinued these supplements<sup>9</sup>. There are differences between  
73 natural folate such as 5-methyltetrahydrofolate (L-methylfolate; 5-MTHF) and synthetic folic  
74 acid, including the internal chemical structure that leads to different processes of metabolism and  
75 different pathways in homocysteine clearance (reviewed in <sup>10</sup>). For example, folic acid is more  
76 bioavailable than natural folate<sup>11</sup> in diet. In addition, overconsumption of folic acid can lead to  
77 excessive levels of unmetabolized folic acid accumulating in blood<sup>12</sup>. Increased and prolonged  
78 exposure to unmetabolized folic acid may confer some toxic effects in older female  
79 populations<sup>13</sup>. While there are numerous studies supporting folate supplementation in women for  
80 the benefit of child development, studies rarely examine whether 5-MTHF or folic acid can  
81 affect women's health. This study aimed to address this gap and directly compare how different  
82 doses of both 5-MTHF and folic acid affect endocrine and neural outcomes in adult female rats.

83 Folate is an important regulator of neuroplasticity, including neurogenesis, during  
84 development<sup>14,15</sup> and during adulthood<sup>16,17</sup>. Particular attention has been paid to folate  
85 deficiencies during pregnancy as it is detrimental for fetal nervous system development in  
86 utero<sup>18</sup>. In adult mammals, the hippocampus retains the ability to generate new neurons  
87 throughout life<sup>19,20</sup>. Although less well studied, folate levels also influence hippocampal  
88 neurogenesis in adult or aging populations<sup>16,17</sup>. However, to our knowledge no studies have been  
89 conducted examining neurogenesis in adult female rodents after folate manipulations and this  
90 study sought to rectify this deficiency in the literature. Metabolites of the 5-MTHF and folic acid  
91 metabolic cycle contribute to the formation of purine rings and the conversion of uracil to  
92 thymidine for DNA synthesis<sup>21</sup>. Elevated homocysteine levels due to folate deficiencies are  
93 associated with cell death and DNA damage<sup>22-24</sup> that may lead to reduced neurogenesis. In this  
94 study we used the endogenous marker, doublecortin (DCX), as it is expressed in immature  
95 neurons up until 21-30 days in rats<sup>25</sup> to examine the effects of 5-MTHF or folic acid in immature  
96 neurons. In addition, we examined neurogenesis via the survival of 28-day old  
97 bromodeoxyuridine (BrdU)/NeuN cells that were produced and survived under these dietary  
98 conditions.

99 Most studies have examined the effect of folate deficiencies on neurogenesis rather than  
100 folate supplementation. Previously, Kronenberg and colleagues<sup>16</sup> showed that in aged mice (sex  
101 not specified), a chronic folic acid-deficient diet for 3 months reduced the number of immature  
102 (DCX) neurons in the dentate gyrus (DG) of the hippocampus compared to animals given a folic  
103 acid enriched diet. In a separate study, one-month-old (juvenile) male mice maintained on a  
104 folate-deficient standard rodent chow for 3.5 months showed reduced adult hippocampal cell  
105 proliferation and survival of 18-day old BrdU+ cells (cells that would have been produced and  
106 survived in the last 18 days of the diet) compared to a control diet<sup>17</sup>. While these reports show  
107 how folate and folic acid deficiencies can reduce neurogenesis and short-term cell survival, no  
108 research to our knowledge has specifically investigated the effects of folate dietary interventions  
109 on adult hippocampal neurogenesis throughout the diet in healthy female rodents. Furthermore,  
110 5-MTHF diets are thought to have advantages over folic acid diets, including lessening the risk  
111 for masking a vitamin B12 deficiency and preventing potential negative effects of unabsorbed  
112 folic acid<sup>10</sup>. Here we sought to identify whether 5-MTHF or folic acid at different doses would  
113 be more effective in influencing adult hippocampal neurogenesis in females.

114 Folate and folic acid may have antidepressant properties as assessed in both clinical and  
115 preclinical studies<sup>26</sup>. For example, women are more likely to present with perinatal depression  
116 when they are folate deficient<sup>27</sup>. In addition, female rodents express less depressive-like  
117 behaviour with higher doses of folic acid<sup>28</sup> and, folic acid can eliminate depressive-like  
118 endophenotypes in female mice that had undergone a corticosterone-induced model of  
119 depression<sup>29</sup>, which was comparable to pharmacological antidepressant treatment. Depression is  
120 associated with reduced hippocampal neurogenesis<sup>30</sup>, elevated cortisol levels<sup>31</sup>, and lower levels  
121 of folic acid and elevated homocysteine<sup>32,33</sup>. One mechanism by which folic acid may contribute  
122 to mood elevation is through its effects on stress hormones via homocysteine metabolism<sup>34</sup>. For  
123 example, acute restraint stress increased homocysteine levels in female rats<sup>35</sup>, and 7 days of folic  
124 acid supplementation (30mg/kg) slightly, but not significantly, reduced corticosterone levels in  
125 female mice after three weeks corticosterone treatment<sup>29</sup>. These findings suggest that folic acid  
126 may elicit antidepressant effects by reducing homocysteine and modulating the corticosterone  
127 system. Thus, in the present study we examined homocysteine and corticosterone levels with  
128 folate and folic acid diets.

129 Few studies have studied the differential effects of folic acid versus folate dietary  
130 supplementation and thus this study was designed to examine differences between the two diets  
131 at different doses on hippocampal neurogenesis, plasma homocysteine and serum corticosterone  
132 levels in adult female rats. As folic acid can be synthesized in the gut and not elsewhere in the  
133 body, here we used 5-MTHF diets with or without SST to better understand the effects of folate  
134 supplementation alone without folic acid. We expect that there would be differential effects of 5-  
135 MTHF versus folic acid to increase neurogenesis in the hippocampus of adult female rats that  
136 may be associated with changes in plasma homocysteine and corticosterone. Due to the lack of  
137 data on the effects of the addition of SST in the presence of folate diets, and how it affects  
138 neurogenesis, here we will compare how low folate diets with or with SST will influence  
139 neurogenesis, plasma homocysteine and corticosterone, to determine if at a lower dose of folate  
140 SST can negate the effects of dietary folate.

## 141 2. MATERIALS AND METHODS

### 142 2.1 Animals

143 Thirty adult female Sprague-Dawley (Charles River, Quebec) rats (7 months old) were  
144 individually housed in transparent polyurethane bins (24 x 16 x 46 cm) with aspen chip  
145 bedding, in order to ensure proper monitoring of food consumption. Rats were maintained in a  
146 12 h: 12 h light/dark cycle (lights on at 07:00) and provided rat chow and tap water *ad libitum*.  
147 All protocols were in accordance with ethical guidelines set by Canada Council for Animal Care  
148 and were approved by the University of British Columbia Animal Care Committee. For an  
149 overview of experimental procedures, refer to Figure 1.

### 150 2.2 Dietary Interventions

151 Animals were randomly assigned to one of the following diets (n=5/group; total n=30): 1.  
152 Folate deficient + 1% succinylsulfathiazole (SST; FD+) that will serve as the control group, 2.  
153 Low 5-methyltetrahydrofolate (5-MTHF) + SST was the low folate + SST group (L5-MTHF+),  
154 3. Low 5-MTHF without SST was the low folate group (L5-MTHF), 4. High 5-MTHF + 1% SST  
155 was the high folate + SST group (H5-MTHF+), 5. Low folic acid (LFA), 6. High folic acid  
156 (HFA). Specifically, 5-MTHF was purchased from Vitacost.com, Boca Raton, FL, USA and  
157 formulated with a control folate and folic acid deficient diet (TD.06691) by Harlan Laboratories,  
158 Inc., Madison WI, US, to create the 5-MTHF diets. Folic acid diets were formulated directly by  
159 Harlan Laboratories, Inc., Madison WI, US with the control diet (TD.06691). The antibacterial  
160 agent, SST was added to folate diets and the control diet to prevent folic acid synthesis through  
161 the gut microbiome<sup>5</sup> by Harlan laboratories Inc., Madison WI, US, directly. In animals with SST  
162 treatment, it was assumed that there would not be any *de novo* folic acid synthesis by gut  
163 bacteria, as it is commonly used to induce a folic acid deficient diet for rodents<sup>36</sup>. The control  
164 diet does not contain any folate or folic acid, all other diets were identical with the exception of  
165 the additional doses of 5-MTHF or folic acid per treatment group. All other vitamins as well as  
166 caloric value remained the same among all 6 diets. For an overview of details regarding the diets,  
167 refer to Table 1. Diets were given for 29 days. Doses were chosen based on studies in which  
168 similar doses showed efficacy in increasing neurogenesis in male rats in a model of cerebral

169 ischemia<sup>37</sup>. Food consumption was monitored (food weighed) for weekly intake of folic acid or  
170 folate diets. Body mass was also monitored every 7 d.

### 171 *2.3 Estrous cycle sample and cytology*

172 Vaginal lavage samples were taken on the first day of the diet, and again on the last day  
173 of the diet. To determine estrous cycle stages, lavage slides were stained with cresyl violet stain  
174 and classified via microscopy by cell phenotypes<sup>38</sup>.

### 175 *2.4 Bromodeoxyuridine (BrdU) preparation*

176 Approximately 24 h after animals began their new diet, animals received a single  
177 injection of bromodeoxyuridine (BrdU; 200 mg/kg dose; i.p.), dissolved in 0.9 saline for a stock  
178 solution concentration of 20mg/ml. BrdU is a thymidine analogue and a DNA synthesis marker,  
179 which labels dividing cells and their progeny. Thus, newly dividing cells were born in different  
180 folate/folic acid environments, allowing us to investigate whether cells born into different  
181 folate/folic acid environments would affect subsequent survival of these BrdU-positive (BrdU+)  
182 cells. Animals were euthanized 28 days later, therefore BrdU tagged cells were 28 days old.

### 183 *2.5 Blood collection, corticosterone, and homocysteine analysis*

184 Twenty-four hours prior to dietary interventions and again after 29 days of dietary  
185 intervention, blood samples were collected via tail vein. All blood samples were collected within  
186 3 min of touching the cage.

187 Plasma samples were collected with the anticoagulant EDTA (37.5 mg/ml) dissolved in  
188 deionized water. Plasma blood was then centrifuged at 10,000 g for 15 min immediately. Serum  
189 blood samples were stored overnight at 4°C to allow blood to clot completely, and then  
190 centrifuged at 10,000 g for 15 min. The serum and plasma were collected and stored at -20°C  
191 until radioimmunoassay.

192 Total CORT (bound and free) was measured on the serum samples using the ImmuChem  
193 Double Antibody 125I radioimmunoassay Kit (MP Biomedicals, Solon, OH, USA). The  
194 antiserum cross-reacts 100% with CORT, 0.34% with deoxycorticosterone, 0.05% with cortisol,  
195 and does not cross-react with dexamethasone (<0.01%). All reagents were halved, and samples



196 run in duplicates. Percent change in serum CORT was calculated following the formula ((CORT  
197 levels after treatment – CORT levels prior to treatment)/CORT levels prior to treatment) \* 100.

198 Plasma homocysteine levels were measured by liquid chromatography-tandem mass  
199 spectrometry in the Analytical Core for Metabolomics and Nutrition laboratories located at BC  
200 Children's Hospital Research Institute at the University of British Columbia as described by  
201 Dominguez-Salas et al.<sup>39</sup> once after dietary treatment.

## 202 *2.6 Tissue Collection*

203 On Day 29, rats were then weighed and given an overdose of Sodium Pentobarbital  
204 (Euthanyl). Adrenal glands and ovarian tissue were collected and weighted. Rats were then  
205 transcardially perfused with 60 ml cold saline followed by 120 ml cold 4% paraformaldehyde (in  
206 0.1M phosphate buffer). Brains were then extracted and post-fixed containing 4%  
207 paraformaldehyde overnight at 4°C. Brains were then transferred to 30% sucrose in phosphate  
208 buffer at 4°C. Brains were rapidly frozen and sectioned using a freezing microtome (Leica,  
209 Richmond Hill, ON, Canada) at 30 µm in a series of 10. Sections were stored in 30 % ethylene  
210 glycol/ 20% glycerol in phosphate buffer; Sigma) and stored at -20°C until processing.

## 211 *2.7 Immunohistochemistry*

### 212 *Doublecortin (DCX)*

213 DCX is expressed in immature neurons<sup>40</sup> between 4 hours to 21 days after production in  
214 rats<sup>25</sup> with longer timelines in mice<sup>41</sup>. In our case, DCX-expressing cells would have been  
215 exposed to dietary manipulations. The morphology of DCX-expressing cells has been used to  
216 show the maturity stages of these new neurons<sup>42</sup> (proliferative, intermediate, and post-mitotic)  
217 and generally the more mature morphology will indicate a longer duration of exposure of the  
218 DCX-expressing cells to the diet. Thus, here we provide the number of DCX-expressing cells  
219 and also the morphology of those cells to determine whether morphological phenotype different  
220 with dietary condition. Immunohistochemistry for DCX was conducted as previously described  
221 <sup>34,35</sup>. Briefly, sections were rinsed 5 x 10 min in 0.1 M phosphate buffered saline (PBS), treated  
222 with 0.3% hydrogen peroxide in dH<sub>2</sub>O for 30 min, and incubated at 4 °C in primary antibody  
223 solution: 1:1000, goat anti-DCX (Santa Cruz Biotechnology, Santa Cruz, CA, USA) with 0.04%

224 Triton-X in PBS and 3% normal rabbit serum for 24 h. Sections were then rinsed 5 x 10 min in  
225 0.1 M PBS and transferred to a secondary antibody solution with 1:500, rabbit anti-goat (Vector  
226 Laboratories, Burlington, ON, Canada) in 0.1 M PBS for 24 h at 4°C. Then, sections were  
227 washed 5 x 10 min in 0.1 M PBS and incubated in ABC complex (ABC Elite Kit; 1:1000;  
228 Vector) for 4 h. Sections were then washed in 0.175 M sodium acetate buffer 2 x 2 min. Finally,  
229 sections were developed using diaminobenzidine in the presence of nickel (DAB Peroxidase  
230 Substrate Kit, Vector), mounted on slides, and dried. Sections were then counterstained with  
231 cresyl violet, dehydrated, and cover-slipped with Permount (Fisher Scientific, Hampton, NH,  
232 USA).

### 233 *Bromodeoxyuridine (BrdU)*

234 To examine the influence of dietary interventions on cytogenesis and complement our  
235 DCX data with the DNA synthesis marker, BrdU. BrdU can be used as a marker of cell  
236 proliferation or survival of new cells depending on the timeline between injection and  
237 perfusion<sup>43</sup>. Here, we are examining the influence of diet on cell survival as we injected BrdU on  
238 day 1, 24 h after dietary supplementation and perfused the animals 28 days later. Sections were  
239 rinsed 3 x 10 min in 0.1 M Tris-buffered saline (TBS), treated with 0.6% hydrogen peroxide in  
240 dH<sub>2</sub>O for 30 min, and washed 3 x 10 min in 0.1 M TBS. Sections were then incubated in 2N  
241 hydrochloric acid at 37 °C for 30 min. And then incubated in 0.1M borate buffer for 10 min.  
242 Sections were then rinsed 3 x 10 min in 0.1 M TBS and blocked with 0.3% Triton-X and 3%  
243 normal horse serum (MilliporeSigma, MA, USA) mixed in 0.1 M TBS (TBS+). Sections were  
244 then incubated at 4 °C in primary antibody solution: 1:200, mouse anti-BrdU (Roche, Basel,  
245 Switzerland) mixed in TBS+ solution for 30-48 h. Sections were then rinsed 3 x 10 min in 0.1 M  
246 TBS and transferred to a secondary antibody solution with 1:200 anti-mouse IgG (Vector  
247 Laboratories, Burlington, ON, Canada) in TBS+ for 4 h at 4°C. Then, sections were washed 3 x  
248 10 min in 0.1 M TBS and incubated in ABC complex (ABC Elite Kit; 1:1000; Vector) for 1.5 h.  
249 Sections were then washed 3 x 10 min in 0.1 M TBS. Finally, sections were developed using  
250 diaminobenzidine in the presence of nickel (DAB Peroxidase Substrate Kit, Vector), washed 3 x  
251 10 min in 0.1 M TBS, mounted on slides, and dried. Sections were then counterstained with  
252 cresyl violet, dehydrated, and cover-slipped with Permount (Fisher Scientific, Hampton, NH,  
253 USA).

254 *BrdU/NeuN double labelling*

255 BrdU/NeuN immunofluorescent double labelling was used to quantify the number of new  
256 cells (BrdU+) that have differentiated into neurons (NeuN) and have survived within the  
257 hippocampus to examine neurogenesis (Figure 4E)<sup>44</sup>. All brain slices were rinsed in tris-buffered  
258 saline (TBS) 3 x 10 min and then blocked with TBS + 0.3% Triton-X and 3% normal donkey  
259 serum (MilliporeSigma, MA, USA; TBS+) for 30min prior to all primary and secondary  
260 antibody incubations. All primary and secondary antibody solutions were made with TBS +  
261 0.1% Triton-X and 3% NDS. Briefly, tissue slices were incubated in primary 1:500 mouse anti-  
262 NeuN (MilliporeSigma, MA, USA) for approximately 48hrs at 4°C. After, tissue slices were  
263 incubated in secondary donkey anti-mouse ALEXA 488 (Invitrogen, Burlington, ON, Canada)  
264 overnight at 4°C. Brain slices were then rinsed 3 x 10 min in TBS, fixed in 4%  
265 paraformaldehyde for 10 min, and then rinsed 2 x 10 min in 0.9% saline solution. Brain sections  
266 then were incubated in 2N hydrochloric acid for 30min at 37°C and incubated in primary rat anti-  
267 BrdU (Abchem Inc, Dorval, QC, Canada) for approximately 48hrs at 4°C. After, sections were  
268 incubated in secondary donkey anti-rat ALEXA 594 (Invitrogen, Burlington, ON, Canada)  
269 overnight at 4°C. Finally, sections were rinsed in TBS 3 x 10 min prior to being mounted onto  
270 microscope slides and cover-slipped with PVA DABCO.

271 *2.8 Microscopy*

272 *Doublecortin (DCX)*

273 Hippocampal slices (1/10<sup>th</sup>) were exhaustively counted for DCX-expressing cells using  
274 the 40x objective of an Olympus C×22LED brightfield microscope. Cells were counted  
275 separately in the dorsal region (-2.76 mm to -4.68mm below bregma) and in the ventral region (-  
276 5.52 mm to -6.60 mm below bregma) as previous studies have shown that these areas can serve  
277 different functions<sup>45</sup>. For exhaustive DCX-expressing cell counts, all sections were counted per  
278 dorsal (~8-11 sections) and ventral region (~7-14 sections; no difference in section numbers  
279 between dietary groups), and then total counts per region were recorded. The total cell count was  
280 then multiplied by 10 (number of slices) to obtain an estimate of the total number of DCX-  
281 expressing cells in the region<sup>46</sup>. Areas of the dentate gyrus were quantified from digitized images  
282 using ImageJ (NIH, Bethesda, MD, USA), and volumes were calculated using Cavalieri's

283 principle<sup>47</sup>. Sixty cells (n = 30 within the dorsal regions; n = 30 within the ventral region) were  
284 randomly selected and were classified by type into 1 out of 3 developmental stages of DCX-  
285 expressing neurons (proliferative, intermediate, and postmitotic) based on morphological  
286 attributes for cell maturity analysis<sup>48</sup>. The percentage of these DCX cells in each morphological  
287 state were recorded. Experimenters were blind to the treatment conditions when conducting  
288 microscopy analyses.

### 289 *Bromodeoxyuridine (BrdU)*

290 BrdU+ cells were quantified in all dorsal sections (-2.76 mm to -4.68mm below bregma)  
291 and all ventral sections (-5.52 mm to -6.60 mm below bregma) using the 100x immersion  
292 objective of a Nikon E600 light microscope in every 10<sup>th</sup> section of the granule cell layer  
293 including the subgranular zone (~5 $\mu$ l of cells between the granule cell layer and hilus). For  
294 exhaustive BrdU+ cell counts, all sections were counted per dorsal (~5-11 sections) and ventral  
295 region (~6-12 sections; no difference in section numbers between dietary groups). We used a  
296 modified optical dissector method<sup>49,50</sup> to estimate the total number of BrdU+ and DCX-  
297 expressing cells, as has been used before<sup>51-55</sup>. Total BrdU+ cell counts were determined by  
298 multiplying by 10.

### 299 *BrdU/NeuN*

300 Fifty BrdU+ cells were randomly selected between dorsal (n = 25 within the dorsal  
301 region) and ventral sections (n = 25 within the ventral region) using the 60x immersion objective  
302 of an Olympus FV1000 confocal microscope. The percentage of BrdU+ cells that also expressed  
303 NeuN were quantified. A neurogenesis index factor was calculated by multiplying the percentage  
304 of BrdU+ cells that also expressed NeuN with the total raw count number of BrdU+ cells  
305 counted as has been done in previous studies<sup>41,56</sup>.

### 306 *2.9 Data Analyses*

307 All data were analyzed using one-way analysis of variance (ANOVA) unless otherwise  
308 specified with diet (FD+, L5-MTHF+, L5-MTHF, H-5MTHF+, LFA, and HFA) as between-  
309 subject factors. Adrenal mass, and ovarian mass were analyzed using one-way analysis of  
310 covariance (ANCOVA) using body mass as a covariate. DCX-expressing cells and relative

311 dentate gyrus volume, BrdU+ cells or BrdU/NeuN-positive (BrdU/NeuN+) cells were analyzed  
312 using repeated measures ANOVA with diet as between-subject factors, and region (dorsal,  
313 ventral) as the within-subjects factor. An additional within-subject factor of developmental  
314 stages (proliferative, intermediate, and post-mitotic) for cell maturity analysis for DCX-  
315 expressing cells. Effect sizes are reported for significant effects. Post hoc comparisons used  
316 Fisher's least significant difference (LSD) test. *A priori* comparisons were subjected to  
317 Bonferroni correction. Pearson product-moment correlations were conducted between body  
318 mass, relative organ mass, serum CORT, dorsal and ventral DCX-expressing cells, dorsal and  
319 ventral BrdU+ cells, and homocysteine levels. All data were analyzed using Statistica software  
320 (v. 9, StatSoft, Inc., Tulsa, OK, USA). All effects were considered statistically significant if  $p \leq$   
321 0.05, trends are discussed if  $p \leq 0.10$ . Outliers were eliminated if higher or lower than 2 standard  
322 deviations from the mean. This happened twice, one case outlier was excluded from the FD+  
323 group when analyzing serum CORT levels and another outlier was excluded from the L-  
324 5MTHF+ group when analyzing BrdU/NeuN cells.

### 325 3. RESULTS

#### 326 *3.1 High folic acid and folate increased adrenal mass, and low folic acid and high folate diets* 327 *reduced homocysteine levels diets but did not influence body mass, ovarian mass, or percent* 328 *change in serum CORT levels*

329 The HFA group had a significant increase in adrenal mass when accounting for the  
330 covariate body mass compared to FD+ ( $p = 0.003$ , Cohen's  $d = 2.900$ ) and trended towards  
331 significance in higher adrenal mass compared to the LFA group ( $p = 0.086$ ). H-5MTHF+ group  
332 had a significant increase in adrenal mass compared to FD+ ( $p = 0.036$ , Cohen's  $d = 1.575$ ) and  
333 L5-MTHF+ ( $p = 0.044$ , Cohen's  $d = 1.655$ ; main effect of diet:  $F(5, 23) = 3.185$ ,  $p = 0.025$ ,  $\eta_p^2$   
334  $= 0.409$ ), but there were no other significant effects on adrenal mass (all  $p$ 's  $\geq 0.159$ ; Figure 2A).  
335 Diet did not statistically influence body mass or ovarian mass (all  $p$ 's  $\geq 0.480$ ). Diet did not  
336 statistically influence percent change in serum CORT levels ( $p = 0.169$ ). Diet did not statistically  
337 influence the relative 1/10<sup>th</sup> volume of the hippocampus ( $p = 0.811$ ).

338 Animals did not differ significantly in estrous cycle stages at the beginning or at the end  
339 of the experiment ( $p = 0.313$ ,  $p = 0.637$ , respectively) nor was estrous cycle stage affected by  
340 dietary treatment ( $p = 0.493$ ). Overall, estrous cycle stage did not influence the number of DCX-  
341 expressing or BrdU+ cells ( $p = 0.254$ ,  $p = 0.769$ , respectively).

342 LFA animals showed a significantly lower homocysteine levels at the end of dietary  
343 treatment compared to FD+ controls ( $p = 0.006$ , Cohen's  $d = 1.501$ ; main effect of diet:  $F(5, 23)$   
344  $= 3.177$ ,  $p = 0.025$ ,  $\eta_p^2 = 0.408$ ; Figure 2B) and L5-MTHF animals ( $p = 0.009$ , Cohen's  $d =$   
345  $1.369$ ). H5-MTHF+ animals showed a significant reduction in homocysteine levels compared to  
346 FD+ ( $p = 0.011$ , Cohen's  $d = 1.956$ ). HFA animals were trending towards significance in a  
347 reduction in homocysteine levels compared to FD+ animals ( $p = 0.064$ ), no other significant  
348 comparisons were found (all  $p$ 's  $\geq 0.100$ ).

#### 349 *3.2 High folic acid and low folate (without SST) increased DCX-expressing cells in the ventral* 350 *dentate gyrus*

351 The HFA diet significantly increased the number of ventral hippocampal DCX-  
352 expressing cells compared to the FD+ ( $p = 0.008$ , Cohen's  $d = 0.894$ ), LFA ( $p = 0.002$ , Cohen's  
353  $d = 1.094$ ), and H5-MTHF+ ( $p = 0.014$ , Cohen's  $d = 0.909$ ) diets. L5-MTHF diet significantly

354 increased the number of ventral hippocampal DCX-expressing cells compared to FD+ ( $p =$   
355  $0.012$ , Cohen's  $d = 0.719$ ), L5-MTHF+ ( $p < 0.001$ , Cohen's  $d = 1.164$ ), and LFA ( $p = 0.006$ ,  
356 Cohen's  $d = 0.888$ ) diets (Figure 3A). HFA diet significantly increased the number of dorsal  
357 hippocampal DCX-expressing cells compared to H5-MTHF+ diet ( $p = 0.032$ , Cohen's  $d = 0.770$ ;  
358 Figure 3B). A significant interaction between diet and dentate gyrus region,  $F(5, 24) = 2.652$ ,  $p =$   
359  $0.048$ ,  $\eta_p^2 = 0.356$ , and a significant main effect of dentate gyrus region,  $F(1, 24) = 16.701$ ,  $p <$   
360  $0.001$ ,  $\eta_p^2 = 0.410$ . No other significant comparisons were found (all  $p$ 's  $\geq 0.102$ ).

361 *3.3 Animals showed significantly higher numbers of post-mitotic doublecortin cells overall,*  
362 *particularly when treated with high folic acid and low folate without SST*

363 Within the ventral dentate gyrus, post hoc analysis indicated a significantly higher  
364 percentage of post-mitotic cells compared to both proliferative and intermediate cells with a  
365 significant main effect of type of cells,  $F(2, 48) = 3.701$ ,  $p = 0.032$ ,  $\eta_p^2 = 0.134$ , and a significant  
366 interaction between type of cells and dentate gyrus region,  $F(2, 48) = 10.243$ ,  $p < 0.001$ ,  $\eta_p^2 =$   
367  $0.299$  (Table 2). Within the dorsal dentate gyrus, post hoc analysis indicated a significantly  
368 higher percentage of intermediate cells compared to proliferative cells (Table 2). *A priori* post-  
369 hoc analysis indicated within the HFA diet group, there were significantly more post-mitotic  
370 DCX-expressing cells compared to proliferative cells ( $p = 0.002$ , Cohen's  $d = 1.585$ ) and  
371 intermediate cells ( $p < 0.001$ , Cohen's  $d = 2.404$ ) within the ventral dentate gyrus (Figure 3F),  
372 and more post-mitotic DCX-expressing cells compared to proliferative cells ( $p = 0.001$ , Cohen's  
373  $d = 1.592$ ) within the dorsal dentate gyrus (Figure 3G). L5-MTHF animals also showed a  
374 significantly higher percentage post-mitotic cells compared to proliferative cells only within the  
375 ventral region ( $p = 0.001$ , Cohen's  $d = 1.761$ ).

376 *3.4 Low folic acid and high folate with SST decreased the number of BrdU/NeuN+ cells within*  
377 *the ventral dentate gyrus*

378 LFA animals showed a significant reduction in ventral BrdU+ cells compared to FD+ ( $p$   
379  $= 0.0161$ , Cohen's  $d = 1.533$ ), L5-MTHF ( $p = 0.008$ , Cohen's  $d = 1.286$ ), and HFA ( $p = 0.001$ ,  
380 Cohen's  $d = 2.668$ ) animals, and a trend towards significance in lower BrdU+ cells compared to  
381 L5-MTHF+ ( $p = 0.064$ ; Figure 4C). H5-MTHF+ animals showed a significant reduction in  
382 BrdU+ cells compared to FD+ ( $p = 0.048$ , Cohen's  $d = 1.048$ ) and HFA ( $p = 0.005$ , Cohen's  $d =$   
383  $1.805$ ) animals. In the dorsal hippocampus, LFA animals showed a significant reduction in

384 BrdU+ cells compared to FD+ ( $p = 0.015$ , Cohen's  $d = 0.992$ ), L5-MTHF+ ( $p = 0.004$ , Cohen's  
385  $d = 1.755$ ), and HFA ( $p < 0.001$ , Cohen's  $d = 1.812$ ) animals (Figure 4D). H5-MTHF+ animals  
386 showed a significant reduction compared to HFA animals ( $p = 0.019$ , Cohen's  $d = 0.992$ ), with a  
387 main effect of diet,  $F(5, 24) = 3.105$ ,  $p = 0.027$ ,  $\eta_p^2 = 0.393$ , and main effect of region,  $F(1, 24)$   
388  $= 16.864$ ,  $p < 0.001$ ,  $\eta_p^2 = 0.413$ , but no significant interaction effect between region and diet ( $p$   
389  $= 0.466$ ). No other pair-wise post hoc comparisons (all  $p$ 's  $\geq 0.135$ ).

390 L5-MTHF+ animals showed lower percentages of BrdU+ cells co-labelled with NeuN in  
391 the ventral region compared to FD+ ( $p = 0.006$ , Cohen's  $d = 1.072$ ) and L5-MTHF ( $p < 0.001$ ,  
392 Cohen's  $d = 1.254$ ) animals. L5-MTHF showed a higher percentage compared to LFA animals ( $p$   
393  $= 0.036$ , Cohen's  $d = 1.938$ ). H5-MTHF+ animals showed a lower percentage compared to FD+  
394 ( $p = 0.004$ , Cohen's  $d = 1.874$ ) and HFA animals ( $p = 0.032$ , Cohen's  $d = 1.287$ ). No significant  
395 post hoc comparisons were found within the dorsal region, LFA animals however showed a trend  
396 towards significance in a higher percentage compared to L5-MTHF+ animals ( $p = 0.084$ ), with a  
397 significant interaction between diet and region,  $F(1, 20) = 2.739$ ,  $p = 0.048$ ,  $\eta_p^2 = 0.406$ , but no  
398 significant main effect of diet or region (both  $p$ 's  $\geq 0.127$ ). No other pair-wise post hoc  
399 comparisons (all  $p$ 's  $\geq 0.100$ ; Figure 4F-G). Chi squared comparisons did not show any  
400 differences in percentages of BrdU/NeuN+ cells within treatment groups (Table 3) or between  
401 treatment groups (Table 4).

402 We next calculated a neurogenesis index by multiplying the percentage of BrdU+ cells  
403 that also expressed NeuN with the number of BrdU+ cells counted in total as has been done in  
404 previous studies<sup>41,56</sup>, and found LFA animals showed a significant reduction in ventral  
405 neurogenesis compared to FD+ ( $p = 0.001$ , Cohen's  $d = 4.412$ ), L5-MTHF ( $p = 0.004$ , Cohen's  $d$   
406  $= 1.193$ ), and HFA ( $p < 0.001$ , Cohen's  $d = 2.403$ ) animals. H5-MTHF+ animals showed a  
407 significant reduction in ventral neurogenesis compared to FD+ ( $p < 0.001$ , Cohen's  $d = 2.972$ )  
408 and HFA animals ( $p < 0.001$ , Cohen's  $d = 2.181$ ). L5-MTHF animals showed a trend towards  
409 significance in higher neurogenesis compared to L5-MTHF+ ( $p = 0.088$ ) within the ventral  
410 region. In the dorsal region, HFA animals showed a significant increase in neurogenesis  
411 compared to LFA ( $p < 0.001$ , Cohen's  $d = 1.727$ ) and H5-MTHF+ animals ( $p < 0.001$ , Cohen's  
412  $d = 1.129$ ), with a significant main effect of diet,  $F(5, 23) = 2.892$ ,  $p = 0.036$ ,  $\eta_p^2 = 0.386$  and a  
413 main effect of region,  $F(1, 23) = 25.801$ ,  $p < 0.001$ ,  $\eta_p^2 = 0.529$ , but no significant interaction



414 effect ( $p = 0.239$ ). No other pair-wise comparisons were significant (all  $p$ 's  $\geq 0.128$ ; Figure 4A-  
415 B).

416 *3.5 Ventral DCX-expressing cells positively correlated with relative adrenal mass, plasma*  
417 *homocysteine, and negatively correlated with serum CORT; within low folate without SST and*  
418 *HFA groups, serum CORT negatively correlated with relative adrenal mass*

419 When analyzing all dietary groups together, there was a significant positive correlation  
420 between ventral total DCX-expressing cells and relative adrenal mass (mg/100g body mass,  $r =$   
421  $0.451$ ,  $p = 0.021$ ; Figure 5A) and plasma homocysteine levels ( $r = 0.406$ ,  $p = 0.039$ ; Figure 5B),  
422 and negatively correlated with serum CORT after dietary treatment ( $r = -0.463$ ,  $p = 0.017$ ; Figure  
423 5D). No significant correlations emerged when divide by diet groups after Bonferroni  
424 corrections (all  $p$ 's  $\geq 0.030$ ). Within the L5-MTHF and HFA group, relative adrenal mass was  
425 negatively correlated with serum CORT levels after dietary treatment,  $r = -0.997$ ,  $p > 0.001$ ,  $r = -$   
426  $0.995$ ,  $p = 0.005$ , respectively (Figure 5C). No other significant comparisons were found by diet  
427 ( $p \geq 0.334$ ).

428 Overall, dorsal total DCX-expressing cells significantly positively correlated with dorsal  
429 BrdU+ and dorsal neurogenesis (both  $p$ 's  $\leq 0.001$ ,  $r = 0.570$  and  $r = 0.690$  respectively; Figure  
430 5E-F). Ventral total DCX-expressing cells significantly positively correlated with ventral BrdU+  
431 and ventral neurogenesis (both  $p$ 's  $\leq 0.006$ ,  $r = 0.528$  and  $r = 0.558$  respectively; Figure 5G-H).  
432 No significant correlations emerged when comparing BrdU+ cell counts and neurogenesis with  
433 serum CORT levels after dietary treatment and relative adrenal mass (all  $p$ 's  $\geq 0.290$ ). Total  
434 ventral BrdU+ cell counts and ventral neurogenesis however, showed trends toward positive  
435 correlations with plasma homocysteine levels ( $p = 0.089$  and  $p = 0.093$ , respectively; data not  
436 shown).

#### 437 4. DISCUSSION

438 In the present study, we found that high folic acid and low folate (5-MTHF) without the  
439 antibacterial SST increased the number of immature neurons (DCX-expressing cells) in the  
440 ventral hippocampus compared to the folate deficient diet. In addition, both low folic acid and  
441 the high folate (5-MTHF) with SST reduced neurogenesis in the ventral hippocampus.  
442 Furthermore, the low 5-MTHF diet group without SST had higher number of DCX-expressing  
443 cells in the ventral hippocampus compared to the low 5-MTHF group with SST. The diet-  
444 dependent changes in DCX-expressing cells resulted in more mature post-mitotic cells than  
445 proliferative cells. However, interestingly the addition of SST, reduced the percentage of BrdU+  
446 cells that also co-expressed NeuN, a marker for mature neurons, suggesting that SST influences  
447 cell fate in the ventral dentate gyrus. High folic acid and high 5-MTHF with SST increased  
448 adrenal mass compared to folate deficient animals. Low folic acid and high 5-MTHF with SST  
449 decreased plasma homocysteine levels compared folate deficient animals. Diet did not influence  
450 the percent change in serum CORT levels across treatment but ventral DCX-expressing cells  
451 were negatively correlated with CORT levels. Collectively, these data suggest that there are  
452 dose-dependent effects of 5-MTHF and folic acid on ventral hippocampal neurogenesis in the  
453 adult female rat, and that SST may interfere with these neurogenic effects.

454 *4.1 High folic acid and low folate without SST increased the number of immature neurons within*  
455 *the ventral hippocampus; low folic acid and high folate decreased neurogenesis within the*  
456 *ventral hippocampus*

457 Here, we show that high folic acid and low 5MTHF without SST increased the number  
458 of immature neurons in the ventral dentate gyrus compared to folate deficient diet in adult female  
459 rats. However, low folic acid and both doses of 5-MTHF groups with SST (low 5-MTHF+ and  
460 high 5-MTHF+) reduced the percentage of BrdU+ cells that was also NeuN+ (28-day old cells)  
461 in the ventral hippocampus. Other reports indicate that folate deficiency after 3.5 months of a  
462 folate deficient diet + SST treatment decreased cell proliferation and the number of 18-day old  
463 BrdU+ cells in male mice<sup>17</sup>. Our results are partially consistent with their data, as a folate  
464 deficient diet in females reduced DCX-expressing cells (expressed for ~21 days) compared to a  
465 high folic acid diet. However, intriguingly, neurogenesis was suppressed in high 5-MTHF with  
466 SST and low folic acid groups compared to the folate deficient diet but only in the ventral

467 dentate gyrus. Together our data suggests that high folic acid can upregulate neurogenesis in the  
468 short-term (immature neurons), but low folic acid and folate diets with SST reduce neurogenesis  
469 (BrdU+ cells) in the longer term. We injected BrdU after 1 day of dietary treatment and perfused  
470 animals 28 days later to examine 28-day old neurons (BrdU/NeuN). However, DCX-expressing  
471 cells were examined after 29 days of dietary treatment, which given they are expressed for up to  
472 21 days in rats<sup>25</sup> suggests these immature neurons are younger than the BrdU+ cells and were  
473 produced after more days of exposure to the diet. Here, we see more post-mitotic than  
474 proliferative DCX-expressing cells in the ventral dentate gyrus, particularly when animals were  
475 treated with HFA diet and low 5-MTHF without SST. This suggests that these new neurons are  
476 more likely to survive into a more mature state. But, given there were no significant increases in  
477 neurogenesis as measured by BrdU/NeuN this also suggests that many of these cells may die  
478 prior to reaching a final mature status.

479         Furthermore, low 5-MTHF without SST, significantly increased the number of ventral  
480 immature neurons compared to low 5-MTHF with SST, suggesting that SST interfered with the  
481 ability of 5-MTHF to increase the number of immature neurons in low folate dose. In addition,  
482 new neurons (BrdU/NeuN+ cells) produced after one day of treatment are less likely to survive  
483 under diets with SST and low folic acid diet. Thus, we can infer that the addition of SST reduced  
484 neurogenesis in the presence of 5-MTHF diet, which may have been due to its effects on the  
485 microbiota or the reduction in folic acid. Additionally, high 5-MTHF with SST reduced  
486 neurogenesis within the ventral hippocampus, but this effect however cannot be distinguished  
487 between folate effects or SST effects due to the lack of a high 5-MTHF without SST group.  
488 Although, for the purpose of this study, we were particularly interested in whether SST could  
489 interfere with low 5-MTHF diet, future studies should consider the addition of a folate deficient  
490 group without SST to determine the effects of anti-bacterial agent alone in this condition, or  
491 adding SST to higher doses of 5-MTHF diet to determine if there is a dose-dependent response.  
492 Overall, our findings suggest strong effects of the antibacterial SST on early stages of  
493 neurogenesis, which is somewhat consistent with Mohle et al.<sup>57</sup>, who found seven weeks of  
494 antibiotics reduced four-week old BrdU+ cells and neurogenesis in adult female mice. Future  
495 studies should consider a longer treatment period or analyzing the number of immature neurons  
496 and mature neurons at different timepoints after dietary treatment.

497 Overall, our results suggest that the introduction of SST (and as a result suppressing gut  
498 folic acid synthesis) can interfere with any potential effects of 5-MTHF to promote neurogenesis  
499 in the adult female rat. The current study indicates that the introduction of the antibacterial SST  
500 to eliminate gut folic acid synthesis negates the effects of natural 5-MTHF on neurogenesis and  
501 should not be adopted in studies wishing to increase neurogenesis. In addition, different doses of  
502 folic acid and 5-MTHF can affect different aspects of neurogenesis or different population of  
503 cells differently within the ventral hippocampus.

504 *4.2 The effects of folic acid and folate on neurogenesis, adrenal glands and CORT: Implications*  
505 *for depression*

506 In the present study, we found low folic acid and high 5-MTHF with SST reduced plasma  
507 homocysteine levels. It is important to note that we utilized a folate deficient diet as a  
508 comparative control group. The purpose of this study was to compare and contrast the effects of  
509 different doses of 5-MTHF and folic acid to a folate deficient group. Furthermore, we saw that  
510 high folic acid and high 5-MTHF with SST increased adrenal mass (but not serum CORT), and  
511 an overall negative correlation between CORT following 5-MTHF/folic acid manipulations to  
512 neurogenesis in the ventral dentate gyrus. Our findings were more significant within the ventral  
513 dentate gyrus, and this is intriguing because there is indirect evidence to suggest more mRNA of  
514 glucocorticoid receptors within the ventral hippocampus, which can be affected by stress  
515 exposure<sup>58</sup>. The ventral hippocampus is also highly involved in regulating the HPA-axis as well,  
516 particularly in regulating the release of corticotrophin-releasing hormone from the  
517 hypothalamus<sup>59</sup>, this relationship is linked to the neurobiology of depression (reviewed in <sup>60</sup>).

518 As mentioned earlier, increased folate and folic acid levels have been associated with  
519 antidepressant-like properties. Folic acid can either act as an antidepressant alone without co-  
520 current pharmacological agent<sup>61</sup> or as an adjuvant with traditional antidepressants<sup>62</sup>. This effect  
521 may be more efficacious for women<sup>62</sup>, and only effective when dietary interventions are  
522 prolonged<sup>63</sup>. In the present study, we found more effects of the diet to regulate neurogenesis in  
523 the ventral hippocampus. This is of interest as the ventral hippocampus is more involved in  
524 regulating stress and anxiety<sup>45,64</sup>. Given that neurogenesis in the hippocampus is important for  
525 mediating some effects of antidepressant efficacy<sup>65</sup> and regulates HPA-axis negative feedback  
526 via neurogenesis in ventral dentate<sup>66</sup>, this may have important implications in treatment of

527 depression in females. Furthermore folate boosts antidepressant efficacy and is linked to  
528 depression<sup>61,62</sup>, it is possible that folic acid and folate diets can help mediate antidepressant  
529 effects by influencing neurogenesis within the ventral hippocampus directly.

530 In addition, depression is associated with higher levels of homocysteine<sup>67</sup> and elevated  
531 levels of cortisol<sup>31,68</sup> it may be that these two measures are related in part via their effects  
532 following dietary folate. Other reports show in a population of healthy middle-aged men and  
533 women, high cortisol levels were negatively associated with serum folate levels<sup>69</sup>, and positively  
534 associated with serum homocysteine levels. Elevated levels homocysteine and low folic acid are  
535 associated with depressive symptoms in middle-aged cohorts of both men and women<sup>32,33</sup>. In our  
536 study, suggestions of associations between increased adrenal mass, reduced serum CORT with  
537 increased immature neurons in the ventral hippocampus. However, we also see a positive  
538 correlation between the number of ventral immature neurons and homocysteine levels, and only  
539 a trend towards a positive correlation with BrdU+ cells. This suggests that homocysteine  
540 metabolism may be involved in regulating different aspects of neurogenesis, and may also  
541 underlie the differences seen between DCX-expressing cells and BrdU+ cells due to 5-  
542 MTHF/folic acid treatment. Furthermore, while higher serum CORT levels overall were  
543 negatively correlated to the number of immature neurons, suggesting higher CORT may suppress  
544 neurogenesis, this effect is not however, affected by diet. Still, the ability of folic acid and 5-  
545 MTHF to modulate the different aspects of neurogenesis in the ventral hippocampus suggests a  
546 potential mechanism by which dietary folate could modify mood even without the modulation of  
547 CORT. In the present study, our dietary treatment was for 29 days, it is possible that with more  
548 prolonged exposure of the diets we would see stronger associations between all these variables.  
549 While in general, elevated homocysteine levels are associated with cell death and DNA damage  
550 that can lead to reduced neurogenesis, both *in vitro*<sup>22-24</sup>, and *in vivo*<sup>23</sup>. In older male rats and  
551 mice, folate supplementation lasting for at least 8-20 weeks is effective at inducing genomic  
552 changes<sup>70,71</sup>. In the present study, supplement duration for 29 days may not be sufficient for  
553 certain folate or folic acid diets to significantly reduce homocysteine levels and to have  
554 significant effects on neurogenesis. Thus, more considerations regarding the length of dietary  
555 treatment is needed for future studies. It is also crucial to note that here, we utilized healthy  
556 female rats to determine whether folate and folic acid could affect biomarkers of depression such

557 as reduced neurogenesis, high levels of CORT or homocysteine. It is also possible that we would  
558 see stronger associations between all these variables in animal models of depression.

559 Another active area of neurogenesis in rodents is the subventricular zone of the olfactory  
560 bulbs. Reduced neurogenesis within the olfactory bulbs has been used as a model of depression  
561 using adult male rats<sup>72</sup>, and olfactory dysfunction is seen in patients with major depressive  
562 disorder<sup>73</sup> but to our knowledge, no studies have examined the effects of folate diet to influence  
563 neurogenesis in this region. Hyperhomocysteinemia have been found to impair both hippocampal  
564 and subventricular zone cell proliferation of neural progenitor cells both *in vitro* and *in vivo*<sup>23</sup>.  
565 Intriguingly, 14-day folic acid treatment in a rat model of cerebral ischemia increased  
566 neurogenesis in the hippocampus and Notch1 signaling, which is critical for SVZ neurogenesis  
567 in male rats<sup>37</sup>. Future studies should investigate the effects of folic acid or folate on olfactory  
568 bulb neurogenesis.

#### 569 *4.3 Folic acid treatment can have different outcomes than 5-MTHF treatment*

570 In the present study, we show some distinct differences in the effects of folic acid vs 5-  
571 MTHF on homocysteine clearance and adult hippocampal neurogenesis. In the literature, there  
572 are more studies utilizing folic acid compared to 5-MTHF, likely due to the fact that folic acid is  
573 more bioavailable than other forms of folate and more stable<sup>11,74</sup>, the latter trait is beneficial for  
574 diet fortification, and thus, more relevant for human studies and animal models. It is important to  
575 note that folic acid and other forms of folate such as 5-MTHF act through distinct pathways of  
576 metabolism<sup>21</sup> and that the mode of delivery and amount consumed can change the efficacy of  
577 both folic acid and folate<sup>75</sup>. Indeed, in the present study, we show that only animals with low  
578 folic acid or high 5-MTHF with SST diets showed significantly reduced levels of plasma  
579 homocysteine levels compared to the folate deficient group. Furthermore, only animals fed the  
580 high folic acid diet and low 5-MTHF without SST, but not the 5-MTHF with SST diets, showed  
581 increased number of immature neurons compared to controls. In addition, while low folic acid  
582 and high 5-MTHF with SST did not influence the number of immature neurons present in the  
583 ventral hippocampus, these groups did show reduced neurogenesis (BrdU/NeuN), without  
584 influencing the maturation of immature DCX-expressing neurons. Additionally, high folic acid  
585 increased the number of immature neurons, it did not suppress the number of mature neurons,  
586 perhaps indicating that these new immature neurons could have reached maturity if we had

587 continued the treatment for a longer period, or alternatively that it takes a week of dietary  
588 treatment to stimulate neurogenesis in this region. Furthermore, in the presence of low doses of  
589 5-MTHF, we found that the antibacterial treatment of SST impeded the ability of 5-MTHF to  
590 increase the number of immature neurons. While high 5-MTHF significantly reduced  
591 neurogenesis, this effect may be confounded by SST treatment. Nevertheless, overall high folic  
592 acid was found to be the most effective at increasing the number of immature neurons,  
593 particularly those that survived into a more mature state, without suppressing mature neurons  
594 than low folic acid and 5-MTHF diets with SST. Again, this suggests that a week of dietary  
595 treatment with high folic acid is needed to show stimulation of neurogenesis. Low 5-MTHF diet  
596 showed similar effect compared to high folic acid than diets with SST, suggesting that without  
597 SST, 5-MTHF diets is somewhat comparable to high folic acid. Thus, collectively these results  
598 suggest that folic acid diets have greater efficacy to increase the number of immature neurons  
599 and reduce homocysteine levels than 5-MTHF diets, and the addition of SST may be interfering  
600 with the effects of 5-MTHF to influence immature neurons. Our data also show that both folic  
601 acid and 5-MTHF with SST diets showed different dose-dependent effect on neurogenesis rates  
602 and homocysteine clearance.

## 603 **5. CONCLUSIONS**

604 In summary, high folic acid and low 5-MTHF without the antibacterial SST increased the  
605 number of immature neurons in neurons that would have been exposed to dietary treatments for a  
606 week, but did not significantly affect neurogenesis in neurons produced 24 hours after exposure.  
607 Low 5-MTHF without the antibacterial SST also increased the number of immature neurons  
608 compared to low 5-MTHF treated with the SST, indicating that SST impaired the ability of 5-  
609 MTHF to enhance neurogenesis, perhaps via its effects on the microbiome. Both low folic acid  
610 and high 5-MTHF with SST decreased neurogenesis in the ventral dentate gyrus (of cells  
611 produced after only 24 hours of exposure to the diet) without influencing the number of  
612 immature neurons. High folic acid and low 5-MTHF were the only intervention that increased  
613 adrenal mass compared to the folate deficient group but surprisingly higher adrenal mass did not  
614 correspond to higher serum CORT levels, which may indicate some disturbances in the HPA  
615 axes functioning. Low folic acid significantly reduced plasma homocysteine levels at the end of  
616 dietary treatment and significantly reduced neurogenesis. Overall, our findings indicate that

617 natural 5-MTHF and synthetic folic acid may act on different pathways to influence hippocampal  
618 neurogenesis and homocysteine metabolism. In the presence of low 5-MTHF, SST blocked any  
619 effects on immature neurons. The lack of effects of 5-MTHF diets with SST compared to folate  
620 deficient animals suggests that modifications to the gut microbiota (or reductions in folic acid)  
621 significantly alter the functionality and efficacy of 5-MTHF to modulate neurogenesis in the  
622 hippocampus. The current study suggests that folic acid and 5-MTHF have differential effects on  
623 neurogenesis, homocysteine metabolism, adrenal mass and serum CORT release depending on  
624 does. Thus, we suggest that folic acid and 5-MTHF are not interchangeable. Furthermore, future  
625 research should be cautioned that the use of SST in folate studies may interfere with  
626 neuroplasticity.

## 627 **CONFLICTS OF INTEREST**

628           The authors have nothing to declare.

629



630 **REFERENCES**

- 631 1. Scott JM a, Weir DG b. Folic acid, homocysteine and one-carbon metabolism: a review of  
632 the essential biochemistry. [Review]. *Journal of Cardiovascular Risk*. 1998 Aug;5(4):223–  
633 7.
- 634 2. Blom HJ, Smulders Y. Overview of homocysteine and folate metabolism. With special  
635 references to cardiovascular disease and neural tube defects. *J Inherit Metab Dis*. 2011  
636 Feb;34(1):75–81.
- 637 3. D’Anci KE, Rosenberg IH. Folate and brain function in the elderly. *Curr Opin Clin Nutr*  
638 *Metab Care*. 2004 Nov;7(6):659–64.
- 639 4. Rossi M, Amaretti A, Raimondi S. Folate Production by Probiotic Bacteria. *Nutrients*. 2011  
640 Jan 18;3(1):118–34.
- 641 5. Burgoon JM, Selhub J, Nadeau M, Sadler TW. Investigation of the effects of folate  
642 deficiency on embryonic development through the establishment of a folate deficient mouse  
643 model. *Teratology*. 2002 May 1;65(5):219–27.
- 644 6. Ogbonnaya ES, Clarke G, Shanahan F, Dinan TG, Cryan JF, O’Leary OF. Adult  
645 Hippocampal Neurogenesis Is Regulated by the Microbiome. *Biological Psychiatry*. 2015  
646 Aug 15;78(4):e7–9.
- 647 7. De Wals P, Tairou F, Van Allen MI, Uh S-H, Lowry RB, Sibbald B, et al. Reduction in  
648 Neural-Tube Defects after Folic Acid Fortification in Canada. *New England Journal of*  
649 *Medicine*. 2007 Jul 12;357(2):135–42.
- 650 8. WHO | Periconceptional folic acid supplementation to prevent neural tube defects  
651 [Internet]. WHO. [cited 2019 May 16]. Available from:  
652 [http://www.who.int/elena/titles/folate\\_periconceptional/en/](http://www.who.int/elena/titles/folate_periconceptional/en/)
- 653 9. Country Profiles- Food Fortification Initiative [Internet]. [cited 2019 May 16]. Available  
654 from: [http://www.ffinetwork.org/country\\_profiles/index.php](http://www.ffinetwork.org/country_profiles/index.php)
- 655 10. Scaglione F, Panzavolta G. Folate, folic acid and 5-methyltetrahydrofolate are not the same  
656 thing. *Xenobiotica*. 2014 May;44(5):480–8.
- 657 11. Sanderson P, McNulty H, Mastroiacovo P, McDowell IFW, Melse-Boonstra A, Finglas  
658 PM, et al. Folate bioavailability: UK Food Standards Agency workshop report. *British*  
659 *Journal of Nutrition*. 2003 Aug;90(02):473.
- 660 12. Kelly P, McPartlin J, Goggins M, Weir DG, Scott JM. Unmetabolized folic acid in serum:  
661 acute studies in subjects consuming fortified food and supplements. *Am J Clin Nutr*. 1997  
662 Jun 1;65(6):1790–5.

- 663 13. Troen AM, Mitchell B, Sorensen B, Wener MH, Johnston A, Wood B, et al. Unmetabolized  
664 folic acid in plasma is associated with reduced natural killer cell cytotoxicity among  
665 postmenopausal women. *J Nutr.* 2006 Jan;136(1):189–94.
- 666 14. Mattson MP, Shea TB. Folate and homocysteine metabolism in neural plasticity and  
667 neurodegenerative disorders. *Trends in Neurosciences.* 2003 Mar 1;26(3):137–46.
- 668 15. Blom HJ, Shaw GM, Heijer M den, Finnell RH. Neural tube defects and folate: case far  
669 from closed. *Nat Rev Neurosci.* 2006 Sep;7(9):724–31.
- 670 16. Kronenberg G, Harms C, Sobol RW, Cardozo-Pelaez F, Linhart H, Winter B, et al. Folate  
671 Deficiency Induces Neurodegeneration and Brain Dysfunction in Mice Lacking Uracil  
672 DNA Glycosylase. *J Neurosci.* 2008 Jul 9;28(28):7219–30.
- 673 17. Kruman II, Mouton PR, Emokpae RJ, Cutler RG, Mattson MP. Folate deficiency inhibits  
674 proliferation of adult hippocampal progenitors. *NeuroReport.* 2005 Jul 13;16(10):1055.
- 675 18. Antony AC. In utero physiology: role of folic acid in nutrient delivery and fetal  
676 development. *Am J Clin Nutr.* 2007 Feb 1;85(2):598S-603S.
- 677 19. Cameron HA, McKay RD. Adult neurogenesis produces a large pool of new granule cells  
678 in the dentate gyrus. *J Comp Neurol.* 2001 Jul 9;435(4):406–17.
- 679 20. Spalding KL, Bergmann O, Alkass K, Bernard S, Salehpour M, Huttner HB, et al.  
680 Dynamics of hippocampal neurogenesis in adult humans. *Cell.* 2013 Jun 6;153(6):1219–27.
- 681 21. Scott J, Rébeillé F, Fletcher J. Folic acid and folates: the feasibility for nutritional  
682 enhancement in plant foods. *Journal of the Science of Food and Agriculture.* 2000 May  
683 15;80(7):795–824.
- 684 22. Kruman II, Culmsee C, Chan SL, Kruman Y, Guo Z, Penix L, et al. Homocysteine Elicits a  
685 DNA Damage Response in Neurons That Promotes Apoptosis and Hypersensitivity to  
686 Excitotoxicity. *J Neurosci.* 2000 Sep 15;20(18):6920–6.
- 687 23. Rabaneda LG, Carrasco M, López-Toledano MA, Murillo-Carretero M, Ruiz FA, Estrada  
688 C, et al. Homocysteine inhibits proliferation of neuronal precursors in the mouse adult brain  
689 by impairing the basic fibroblast growth factor signaling cascade and reducing extracellular  
690 regulated kinase 1/2-dependent cyclin E expression. *The FASEB Journal.* 2008  
691 Nov;22(11):3823–35.
- 692 24. Kruman II, Kumaravel TS, Lohani A, Pedersen WA, Cutler RG, Kruman Y, et al. Folic  
693 Acid Deficiency and Homocysteine Impair DNA Repair in Hippocampal Neurons and  
694 Sensitize Them to Amyloid Toxicity in Experimental Models of Alzheimer’s Disease. *The*  
695 *Journal of Neuroscience.* 2002 Mar 1;22(5):1752–62.
- 696 25. Brown JP, Couillard Després S, Cooper Kuhn CM, Winkler J, Aigner L, Kuhn HG.  
697 Transient expression of doublecortin during adult neurogenesis. *Journal of Comparative*  
698 *Neurology.* 2003 Dec 1;467(1):1–10.

- 699 26. Coppen A, Bolander-Gouaille C. Treatment of depression: time to consider folic acid and  
700 vitamin B12. *J Psychopharmacol*. 2005 Jan 1;19(1):59–65.
- 701 27. Yan J, Liu Y, Cao L, Zheng Y, Li W, Huang G. Association between Duration of Folic  
702 Acid Supplementation during Pregnancy and Risk of Postpartum Depression. *Nutrients*  
703 [Internet]. 2017 Nov 2 [cited 2018 Oct 19];9(11). Available from:  
704 <https://www.ncbi.nlm.nih.gov/pmc/articles/PMC5707678/>
- 705 28. Molina-Hernández M, Téllez-Alcántara NP, Olivera-López JI, Jaramillo MT. The folic acid  
706 combined with 17- $\beta$  estradiol produces antidepressant-like actions in ovariectomized rats  
707 forced to swim. *Progress in Neuro-Psychopharmacology and Biological Psychiatry*. 2011  
708 Jan 15;35(1):60–6.
- 709 29. Rosa PB, Ribeiro CM, Bettio LEB, Colla A, Lieberknecht V, Moretti M, et al. Folic acid  
710 prevents depressive-like behavior induced by chronic corticosterone treatment in mice.  
711 *Pharmacology Biochemistry and Behavior*. 2014 Dec 1;127:1–6.
- 712 30. Boldrini M, Hen R, Underwood MD, Rosoklija GB, Dwork AJ, Mann JJ, et al.  
713 HIPPOCAMPAL ANGIOGENESIS AND PROGENITOR CELL PROLIFERATION ARE  
714 INCREASED WITH ANTIDEPRESSANT USE IN MAJOR DEPRESSION. *Biol*  
715 *Psychiatry*. 2012 Oct 1;72(7):562–71.
- 716 31. Stetler C, Miller GE. Depression and Hypothalamic-pituitary-adrenal Activation: A  
717 Quantitative Summary of Four Decades of Research. *Psychosomatic Medicine*. 2011 Feb  
718 1;73(2):114–26.
- 719 32. SACHDEV PS, PARSLOW RA, LUX O, SALONIKAS C, WEN W, NAIDOO D, et al.  
720 Relationship of homocysteine, folic acid and vitamin B12 with depression in a middle-aged  
721 community sample. *Psychological Medicine*; Cambridge. 2005 Apr;35(4):529–38.
- 722 33. Bottiglieri T, Laundry M, Crellin R, Toone BK, Carney MWP, Reynolds EH.  
723 Homocysteine, folate, methylation, and monoamine metabolism in depression. *Journal of*  
724 *Neurology, Neurosurgery & Psychiatry*. 2000 Aug 1;69(2):228–32.
- 725 34. Kim MH, Kim E, Passen EL, Meyer J, Kang S-S. Cortisol and estradiol: Nongenetic factors  
726 for hyperhomocyst(e)inemia. *Metabolism*. 1997 Mar;46(3):247–9.
- 727 35. de Souza FG, Rodrigues MDB, Tufik S, Nobrega JN, D’Almeida V. Acute stressor-  
728 selective effects on homocysteine metabolism and oxidative stress parameters in female  
729 rats. *Pharmacology Biochemistry and Behavior*. 2006 Oct 1;85(2):400–7.
- 730 36. Tagbo IF, Hill DC. Effect of folic acid deficiency on pregnant rats and their offspring. *Can*  
731 *J Physiol Pharmacol*. 1977 Jun;55(3):427–33.
- 732 37. Zhang X, Huang G, Liu H, Chang H, Wilson JX. Folic acid enhances Notch signaling,  
733 hippocampal neurogenesis, and cognitive function in a rat model of cerebral ischemia.  
734 *Nutritional Neuroscience*. 2012 Mar 1;15(2):55–61.

- 735 38. Tanapat P, Hastings NB, Reeves AJ, Gould E. Estrogen stimulates a transient increase in  
736 the number of new neurons in the dentate gyrus of the adult female rat. *J Neurosci*. 1999 Jul  
737 15;19(14):5792–801.
- 738 39. Dominguez-Salas P, Moore SE, Cole D, da Costa K-A, Cox SE, Dyer RA, et al. DNA  
739 methylation potential: dietary intake and blood concentrations of one-carbon metabolites  
740 and cofactors in rural African women. *Am J Clin Nutr*. 2013 Jun;97(6):1217–27.
- 741 40. Nacher J, Crespo C, McEwen BS. Doublecortin expression in the adult rat telencephalon.  
742 *Eur J Neurosci*. 2001 Aug;14(4):629–44.
- 743 41. Snyder JS, Choe JS, Clifford MA, Jeurling SI, Hurley P, Brown A, et al. Adult-Born  
744 Hippocampal Neurons Are More Numerous, Faster Maturing, and More Involved in  
745 Behavior in Rats than in Mice. *J Neurosci*. 2009 Nov 18;29(46):14484–95.
- 746 42. Plümpe T, Ehninger D, Steiner B, Klempin F, Jessberger S, Brandt M, et al. Variability of  
747 doublecortin-associated dendrite maturation in adult hippocampal neurogenesis is  
748 independent of the regulation of precursor cell proliferation. *BMC Neurosci*. 2006 Nov  
749 15;7:77.
- 750 43. Taupin P. BrdU immunohistochemistry for studying adult neurogenesis: Paradigms,  
751 pitfalls, limitations, and validation. *Brain Research Reviews*. 2007 Jan 1;53(1):198–214.
- 752 44. Wojtowicz JM, Kee N. BrdU assay for neurogenesis in rodents. *Nature Protocols*. 2006  
753 Aug;1(3):1399–405.
- 754 45. Fanselow MS, Dong H-W. Are the dorsal and ventral hippocampus functionally distinct  
755 structures? *Neuron*. 2010 Jan 14;65(1):7–19.
- 756 46. Schloesser RJ, Manji HK, Martinowich K. Suppression of Adult Neurogenesis Leads to an  
757 Increased HPA Axis Response. *Neuroreport*. 2009 Apr 22;20(6):553–7.
- 758 47. Hassouna I, Ott C, Wüstefeld L, Offen N, Neher RA, Mitkovski M, et al. Revisiting adult  
759 neurogenesis and the role of erythropoietin for neuronal and oligodendroglial differentiation  
760 in the hippocampus. *Molecular Psychiatry*. 2016 Dec;21(12):1752–67.
- 761 48. Workman JL, Gobinath AR, Kitay NF, Chow C, Brummelte S, Galea LAM. Parity  
762 modifies the effects of fluoxetine and corticosterone on behavior, stress reactivity, and  
763 hippocampal neurogenesis. *Neuropharmacology*. 2016 Jun;105:443–53.
- 764 49. West MJ, Slomianka L, Gundersen HJ. Unbiased stereological estimation of the total  
765 number of neurons in the subdivisions of the rat hippocampus using the optical fractionator.  
766 *Anat Rec*. 1991 Dec;231(4):482–97.
- 767 50. West MJ. New stereological methods for counting neurons. *Neurobiol Aging*. 1993  
768 Aug;14(4):275–85.

- 769 51. Kempermann G, Kuhn HG, Gage FH. More hippocampal neurons in adult mice living in an  
770 enriched environment. *Nature*. 1997 Apr;386(6624):493–5.
- 771 52. Eadie BD, Redila VA, Christie BR. Voluntary exercise alters the cytoarchitecture of the  
772 adult dentate gyrus by increasing cellular proliferation, dendritic complexity, and spine  
773 density. *Journal of Comparative Neurology*. 2005;486(1):39–47.
- 774 53. Tanapat P, Hastings NB, Gould E. Ovarian steroids influence cell proliferation in the  
775 dentate gyrus of the adult female rat in a dose- and time-dependent manner. *J Comp Neurol*.  
776 2005 Jan 17;481(3):252–65.
- 777 54. Snyder JS, Choe JS, Clifford MA, Jeurling SI, Hurley P, Brown A, et al. Adult-born  
778 hippocampal neurons are more numerous, faster maturing, and more involved in behavior  
779 in rats than in mice. *J Neurosci*. 2009 Nov 18;29(46):14484–95.
- 780 55. Leuner B, Caponiti JM, Gould E. Oxytocin stimulates adult neurogenesis even under  
781 conditions of stress and elevated glucocorticoids. *Hippocampus*. 2012 Apr;22(4):861–8.
- 782 56. Yagi S, Chow C, Lieblich SE, Galea LAM. Sex and strategy use matters for pattern  
783 separation, adult neurogenesis, and immediate early gene expression in the hippocampus.  
784 *Hippocampus*. 2016;26(1):87–101.
- 785 57. Möhle L, Mattei D, Heimesaat MM, Bereswill S, Fischer A, Alutis M, et al. Ly6C(hi)  
786 Monocytes Provide a Link between Antibiotic-Induced Changes in Gut Microbiota and  
787 Adult Hippocampal Neurogenesis. *Cell Rep*. 2016 31;15(9):1945–56.
- 788 58. Romeo RD, Ali FS, Karatsoreos IN, Bellani R, Chhua N, Vernov M, et al. Glucocorticoid  
789 Receptor mRNA Expression in the Hippocampal Formation of Male Rats before and after  
790 Pubertal Development in Response to Acute or Repeated Stress. *NEN*. 2008;87(3):160–7.
- 791 59. Herman JP, Cullinan WE, Young EA, Akil H, Watson SJ. Selective forebrain fiber tract  
792 lesions implicate ventral hippocampal structures in tonic regulation of paraventricular  
793 nucleus corticotropin-releasing hormone (CRH) and arginine vasopressin (AVP) mRNA  
794 expression. *Brain Res*. 1992 Oct 2;592(1–2):228–38.
- 795 60. Nestler EJ, Barrot M, DiLeone RJ, Eisch AJ, Gold SJ, Monteggia LM. Neurobiology of  
796 Depression. *Neuron*. 2002 Mar 28;34(1):13–25.
- 797 61. Brocardo PS, Budni J, Kaster MP, Santos ARS, Rodrigues ALS. Folic acid administration  
798 produces an antidepressant-like effect in mice: Evidence for the involvement of the  
799 serotonergic and noradrenergic systems. *Neuropharmacology*. 2008 Feb 1;54(2):464–73.
- 800 62. Coppen A, Bailey J. Enhancement of the antidepressant action of fluoxetine by folic acid: a  
801 randomised, placebo controlled trial. *J Affect Disord*. 2000 Nov;60(2):121–30.
- 802 63. Almeida OP, Ford AH, Hirani V, Singh V, vanBockxmeer FM, McCaul K, et al. B vitamins  
803 to enhance treatment response to antidepressants in middle-aged and older adults: results

- 804 from the B-VITAGE randomised, double-blind, placebo-controlled trial. *British Journal of*  
805 *Psychiatry*. 2014 Dec;205(06):450–7.
- 806 64. Sahay A, Hen R. Adult hippocampal neurogenesis in depression. *Nat Neurosci*. 2007  
807 Sep;10(9):1110–5.
- 808 65. Santarelli L, Saxe M, Gross C, Surget A, Battaglia F, Dulawa S, et al. Requirement of  
809 Hippocampal Neurogenesis for the Behavioral Effects of Antidepressants. *Science*. 2003  
810 Aug 8;301(5634):805–9.
- 811 66. Surget A, Tanti A, Leonardo ED, Laugeray A, Rainer Q, Touma C, et al. Antidepressants  
812 recruit new neurons to improve stress response regulation. *Molecular Psychiatry*. 2011  
813 Dec;16(12):1177–88.
- 814 67. Almeida OP, Flicker L, Norman P, Hankey GJ, Vasikaran S, van Bockxmeer FM, et al.  
815 Association of Cardiovascular Risk Factors and Disease With Depression in Later Life. *The*  
816 *American Journal of Geriatric Psychiatry*. 2007 Jun 1;15(6):506–13.
- 817 68. Burke HM, Davis MC, Otte C, Mohr DC. Depression and cortisol responses to  
818 psychological stress: A meta-analysis. *Psychoneuroendocrinology*. 2005 Oct;30(9):846–56.
- 819 69. Cascalheira JF, Parreira MC, Viegas AN, Faria MC, Domingues FC. Serum Homocysteine:  
820 Relationship with Circulating Levels of Cortisol and Ascorbate. *Annals of Nutrition and*  
821 *Metabolism*. 2008;53(1):67–74.
- 822 70. Choi S-W, Friso S, Keyes MK, Mason JB. Folate supplementation increases genomic DNA  
823 methylation in the liver of elder rats. *British Journal of Nutrition*. 2005 Jan;93(1):31–5.
- 824 71. Keyes MK, Jang H, Mason JB, Liu Z, Crott JW, Smith DE, et al. Older Age and Dietary  
825 Folate Are Determinants of Genomic and p16-Specific DNA Methylation in Mouse Colon.  
826 *J Nutr*. 2007 Jul 1;137(7):1713–7.
- 827 72. Yang D, Li Q, Fang L, Cheng K, Zhang R, Zheng P, et al. Reduced neurogenesis and pre-  
828 synaptic dysfunction in the olfactory bulb of a rat model of depression. *Neuroscience*. 2011  
829 Sep 29;192:609–18.
- 830 73. Pause BM, Miranda A, Göder R, Aldenhoff JB, Ferstl R. Reduced olfactory performance in  
831 patients with major depression. *Journal of Psychiatric Research*. 2001 Sep 1;35(5):271–7.
- 832 74. Ohrvik VE, Witthoft CM. Human Folate Bioavailability. *Nutrients*. 2011 Apr 18;3(4):475–  
833 90.
- 834 75. Brouwer IA, van Dusseldorp M, West CE, Steegers-Theunissen RPM. Bioavailability and  
835 bioefficacy of folate and folic acid in man. *Nutrition Research Reviews*. 2001  
836 Dec;14(02):267.

837

838 **Figure Legend**

839 **Figure 1.** Timeline of Experiment.

840 **Figure 2. A.** Mean and + standard error of the mean (SEM) of adrenal mass, and individual data  
841 points of adrenal mass dependent on dietary interventions. High folic acid (HFA) and high folate  
842 + succinylsulfathiazole (H5-MTHF+) animals showed increased adrenal mass when controlling  
843 for final body mass compared to folate deficient (FD+) animals. H5-MTHF+ animals also had  
844 larger adrenal mass compared to low folate + succinylsulfathiazole (L5-MTHF+), \* indicate  
845 significance at  $p = 0.05$ . **B.** Mean and + SEM of plasma homocysteine levels ( $\mu\text{M}$ ) and individual  
846 data points of homocysteine levels. Low folic acid (LFA) animals showed a significant decrease  
847 in homocysteine levels compared to FD+ controls and low folate (L5-MTHF) animals. H5-  
848 MTHF+ animals also showed a significant decrease in homocysteine levels compared to FD+  
849 animals, \* indicate significance at  $p = 0.05$

850 **Figure 3. A.** Mean and + standard error of the mean (SEM) of total doublecortin (DCX)-  
851 expressing cell counts, and individual data points of DCX-expressing cell counts dependent on  
852 dietary interventions within the ventral dentate gyrus region of the hippocampus. High folic acid  
853 (HFA) group showed significantly more DCX-expressing immature neurons within the ventral  
854 region compared to folate deficient (FD+) controls, low folic acid (LFA) and high folate +  
855 succinylsulfathiazole (H5-MTHF+) groups. Low folate without SST (L5-MTHF) group showed  
856 higher DCX-expressing immature neurons compared to the FD+ controls, low folate + SST (L5-  
857 MTHF+), and LFA group, \* indicate significance at  $p = 0.05$ . **B.** Mean and + SEM of DCX-  
858 expressing cell counts, and individual data points of DCX-expressing cell counts dependent on  
859 dietary interventions within the dorsal dentate gyrus region of the hippocampus. HFA group  
860 showed significantly higher DCX-expressing cell counts compared only to the H5-MTHF+  
861 group, \* indicate significance at  $p = 0.05$ . **C-E.** DCX-expressing cells along the granule cell  
862 layer of the hippocampal dentate gyrus, pictures taken at 60x objective magnification. Arrow  
863 head indicated DCX-expressing cells (pink: proliferative DCX-expressing cells; black:  
864 intermediate DCX-expressing cells; white: post-mitotic DCX-expressing cells). **F.** Mean and +  
865 SEM of % type of DCX-expressing cells, and individual data points of % type of DCX-  
866 expressing cells within the ventral region of the hippocampus. HFA animals showed

867 significantly more post-mitotic cells compared to proliferative and intermediate cells. L5-MTHF  
868 animals showed significantly more post-mitotic cells compared to proliferative cells, \* indicate  
869 significance at  $p = 0.05$ . **G.** Mean and + SEM of % type of DCX-expressing cells, and individual  
870 data points of % type of DCX-expressing cells within the dorsal region of the hippocampus.  
871 HFA animals showed significantly more post-mitotic cells compared to proliferative cells, \*  
872 indicate significance at  $p = 0.05$ .

873 **Figure 4. A.** Mean and + standard error of the mean (SEM) of neurogenesis index factor  
874 (percentage of bromodeoxyuridine (BrdU)/NeuN-positive (BrdU/NeuN+) cell counts  $\times$  total  
875 BrdU-positive (BrdU+) cell counts), and individual data points of neurogenesis index factor  
876 dependent on dietary intervention within the ventral dentate gyrus region of the hippocampus.  
877 High folate + succinylsulfathiazole (H5-MTHF+) decreased neurogenesis compared to folate  
878 deficient (FD+) controls, and high folic acid (HFA) animals. Low folic acid (LFA) decreased  
879 neurogenesis compared to FD+, low folate (L5-MTHF), and HFA animals, \* indicate  
880 significance at  $p = 0.05$ . **B.** Mean and + SEM of neurogenesis index factor, and individual data  
881 points of neurogenesis index factor dependent on dietary intervention within the dorsal dentate  
882 gyrus region of the hippocampus. HFA animals showed higher neurogenesis compared to LFA  
883 and H5-MTHF+ animals, \* indicate significance at  $p = 0.05$ . **C.** Mean and + SEM of total BrdU+  
884 cell counts, and individual data points of BrdU+ cell counts dependent on dietary intervention  
885 within the ventral dentate gyrus region of the hippocampus. HFA group showed significantly  
886 more BrdU+ cells within the ventral region compared to LFA and H5-MTHF+ groups. LFA  
887 group showed significantly less BrdU+ cells compared to the L5-MTHF and FD+ groups. H5-  
888 MTHF+ showed a significantly lower number of BrdU+ cells compared to FD+ group, \*indicate  
889 significance at  $p = 0.05$ . **D.** Mean and + SEM of total BrdU+ cell counts, and individual data  
890 points of BrdU+ cell counts dependent on dietary interventions within the dorsal dentate gyrus  
891 region of the hippocampus. LFA animals showed significantly lower counts of BrdU+ cells  
892 compared to FD+, low folate + succinylsulfathiazole (L5-MTHF+) and HFA animals. HFA  
893 animals showed a significant higher amount of BrdU+ cells compared to H5-MTHF+ animals,  
894 \*indicate significance at  $p = 0.05$ . **E.** Z-stack photomicrograph of cells co-labeled with the  
895 fluorescent neuronal marker NeuN (green) and fluorescent BrdU (red). **F.** Mean and +SEM of  
896 the percentage of BrdU+ cells that were also NeuN-positive (NeuN+), and individual data points  
897 of **percentage** of BrdU+ cells that were also NeuN+ within the ventral dentate gyrus. L5-



898 MTHF+ animals showed reduced percentage of BrdU+ cells that were also NeuN+ compared to  
899 FD+ and L5-MTHF animals. H5-MTHF+ animals showed reduced percentage compared to FD+  
900 and HFA animals. LFA animals also showed reduced percentage compared to L-5MTHF  
901 animals, \*indicate significance at  $p = 0.05$ . **G.** Mean and +SEM of the percentage of BrdU+ cells  
902 that were also NeuN+, and individual data points of percentage of BrdU+ cells that were also  
903 NeuN+ within the dorsal dentate gyrus, no statistically significant differences were found.

904 **Figure 5. A.** Correlation between relative adrenal mass and total doublecortin (DCX)-expressing  
905 cell counts in the ventral dentate gyrus. A significant positive correlation emerged when  
906 comparing all dietary groups together,  $p = 0.05$ . **B.** Correlation between plasma homocysteine  
907 levels and total DCX-expressing cell counts in the ventral dentate gyrus. A significant positive  
908 correlation emerged when comparing all dietary groups together,  $p = 0.05$ . **C.** Correlation  
909 between serum corticosterone levels after dietary treatment and relative adrenal mass, where no  
910 statistically significant correlation was observed when all dietary animals were group together,  $p$   
911  $= 0.05$ . When separating animals by dietary interventions, only within the low folate (L5-MTHF)  
912 and the high folic acid (HFA) group, did a significant positive correlation emerge after  
913 Bonferroni's correction,  $p = 0.0083$ . **D.** Correlation between serum corticosterone levels after  
914 dietary treatment and total DCX-expressing cell counts in the ventral dentate gyrus. A significant  
915 positive correlation emerged when comparing all dietary groups together,  $p = 0.05$ . **E.**  
916 Correlation between bromodeoxyuridine (BrdU)-positive (BrdU+) cells in the dorsal dentate  
917 gyrus and total DCX-expressing cell counts in the dorsal dentate gyrus. A significant positive  
918 correlation emerged when comparing all dietary groups together,  $p = 0.05$ . **F.** Correlation  
919 between the rates of neurogenesis in the dorsal dentate gyrus and total DCX-expressing cell  
920 counts in the dorsal dentate gyrus. A significant positive correlation emerged when comparing all  
921 dietary groups together,  $p = 0.05$ . **G.** Correlation between BrdU+ cells in the ventral dentate  
922 gyrus and total DCX-expressing cell counts in the ventral dentate gyrus. A significant positive  
923 correlation emerged when comparing all dietary groups together,  $p = 0.05$ . **F.** Correlation  
924 between the rates of neurogenesis in the ventral dentate gyrus and total DCX-expressing cell  
925 counts in the ventral dentate gyrus. A significant positive correlation emerged when comparing  
926 all dietary groups together,  $p = 0.05$ .

927

| Name of the Diet                                | Folic acid | L-methylfolate | 1% SST | n |
|-------------------------------------------------|------------|----------------|--------|---|
| <b>FD+ (Folate Deficient)</b>                   | 0 mg/kg    | 0 mg/kg        | ✓      | 5 |
| <b>L5-MTHF+ (Low 5-methyltetrahydrofolate)</b>  | 0 mg/kg    | 5 mg/kg        | ✓      | 5 |
| <b>H5-MTHF+ (High 5-methyltetrahydrofolate)</b> | 0 mg/kg    | 15 mg/kg       | ✓      | 5 |
| <b>L5-MTHF (Low 5-methyltetrahydrofolate)</b>   | 0 mg/kg    | 5 mg/kg        | -      | 5 |
| <b>LFA (Low Folic Acid)</b>                     | 5 mg/kg    | 0 mg/kg        | -      | 5 |
| <b>HFA (High Folic Acid)</b>                    | 15 mg/kg   | 0 mg/kg        | -      | 5 |

928

929

930

931

932

933 **Table 1. Description of dietary treatments.**

934

935

|         |                   |         |        | Intermediate                            | Post-mitotic                            |
|---------|-------------------|---------|--------|-----------------------------------------|-----------------------------------------|
| Region  | Type of DCX cells | Mean    | SD     | Dorsal region                           |                                         |
| Dorsal  | Proliferative     | 30.759  | 11.007 | $p = 0.034^*$<br>(Cohen's $d = 0.486$ ) | $p = 0.225$                             |
|         | Intermediate      | 35.696  | 9.241  | <b>X</b>                                | $p = 0.347$                             |
|         | Post-mitotic      | 33.544  | 14.549 | <b>X</b>                                | <b>X</b>                                |
|         |                   |         |        | Ventral region                          |                                         |
| Ventral | Proliferative     | 27.887  | 9.834  | $p = 0.287$                             | $p < 0.001^*$<br>(Cohen's $d = 1.360$ ) |
|         | Intermediate      | 30.3260 | 8.715  | <b>X</b>                                | $p < 0.001^*$<br>(Cohen's $d = 1.182$ ) |
|         | Post-mitotic      | 41.786  | 10.591 | <b>X</b>                                | <b>X</b>                                |

936

937

938

939 **Table 2. Description of  $p$ -values and effect sizes for post-hoc comparisons between dentate**  
 940 **gyrus region and type of DCX-expressing cell (proliferative, intermediate, post-mitotic), \***  
 941 **indicate significance at  $p = 0.05$ .**

| <b>Treatment</b> | <b>Observed % BrdU and NeuN+</b> |                | <b>Expected % BrdU and NeuN+</b> |                | <b>Individual Chi Squared</b> |                |
|------------------|----------------------------------|----------------|----------------------------------|----------------|-------------------------------|----------------|
|                  | <b>Dorsal</b>                    | <b>Ventral</b> | <b>Dorsal</b>                    | <b>Ventral</b> | <b>Dorsal</b>                 | <b>Ventral</b> |
| <b>FD+</b>       | 76                               | 86             | 82.69                            | 80.21          | 0.45                          | 0.46           |
| <b>L5-MTHF</b>   | 71                               | 91             | 82.78                            | 80.30          | 1.59                          | 1.64           |
| <b>L5-MTHF+</b>  | 67                               | 59             | 64.29                            | 62.37          | 0.16                          | 0.16           |
| <b>LFA</b>       | 83                               | 77             | 81.59                            | 79.15          | 0.04                          | 0.04           |
| <b>H5-MTHF+</b>  | 73                               | 72             | 74.02                            | 71.81          | 0.00                          | 0.00           |
| <b>HFA</b>       | 83                               | 56             | 71.09                            | 68.96          | 2.32                          | 2.39           |

942

943

944

945 **Table 3. Description of observed and expected (expected value = (row total x column**  
 946 **total)/grand total) % of bromodeoxyuridine (BrdU)-positive (BrdU+) cells that were also**  
 947 **NeuN-positive (NeuN+), with individual Chi squared values comparing within diets.**

|                             | <b>Value</b> | <b>df</b> | <b><i>p</i>-value</b> |
|-----------------------------|--------------|-----------|-----------------------|
| <b>Pearson's Chi Square</b> | 9.267        | 5         | 0.0989                |
| <b>N of valid cases</b>     | 30           |           |                       |

948

949

950

951

952

953 **Table 4. Description of overall Chi square values comparing between diets.**

954

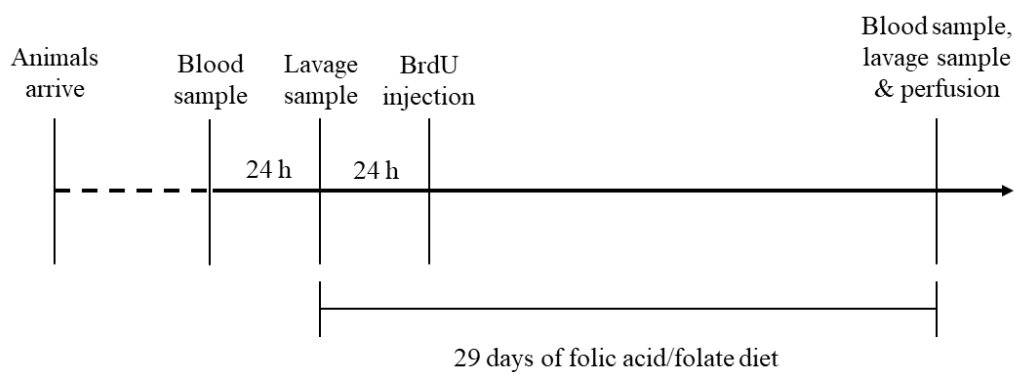

955

956

**Figure 1**

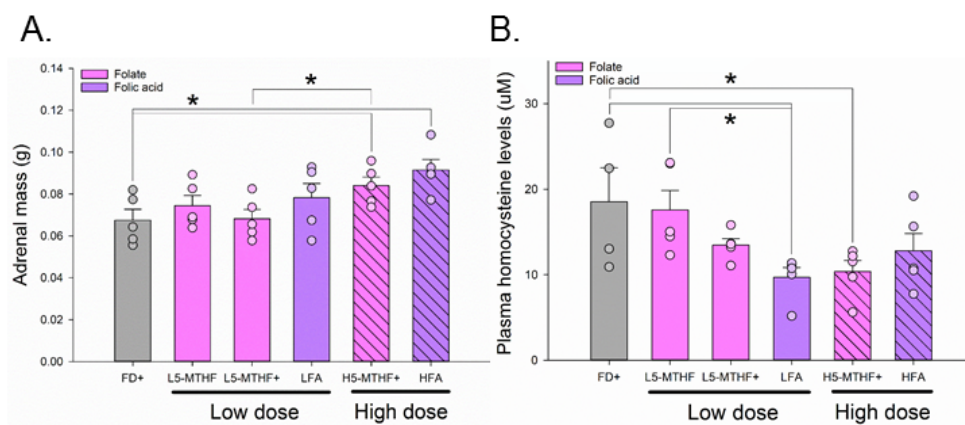

957

958

Figure 2

959

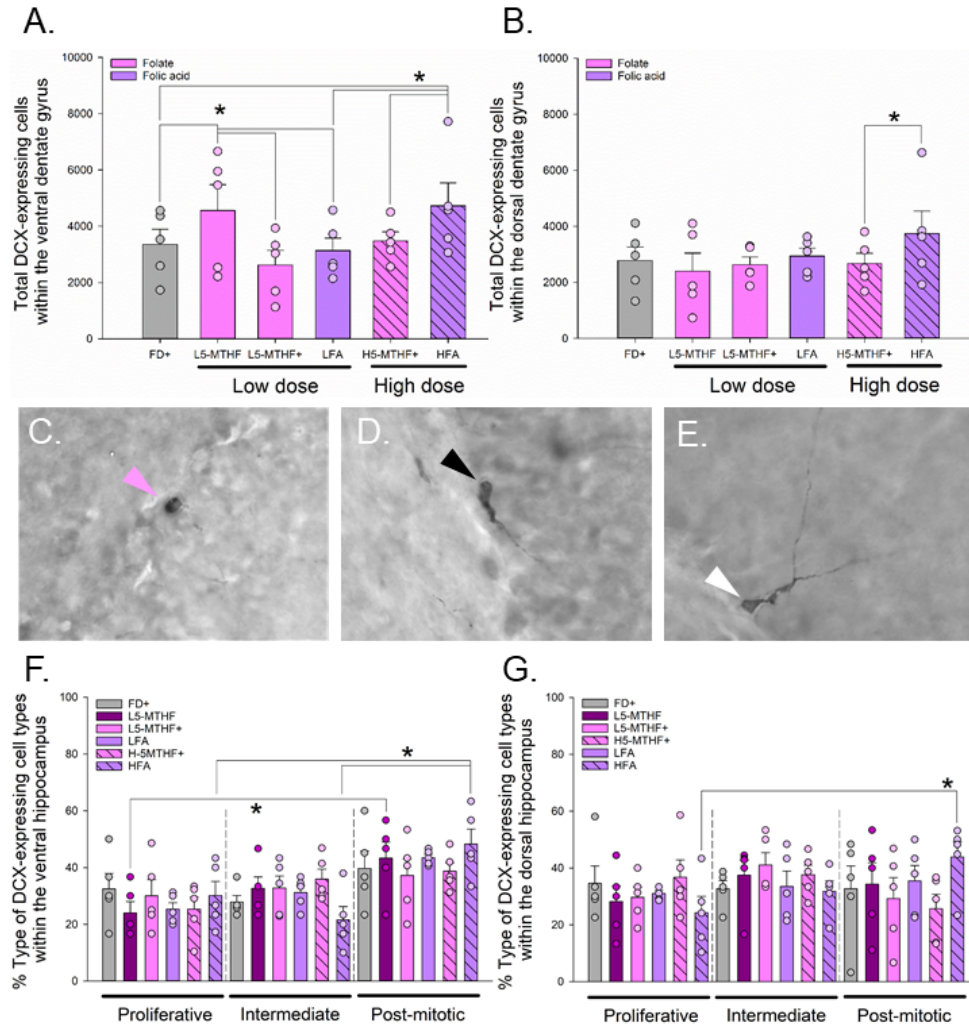

960

961

962

Figure 3



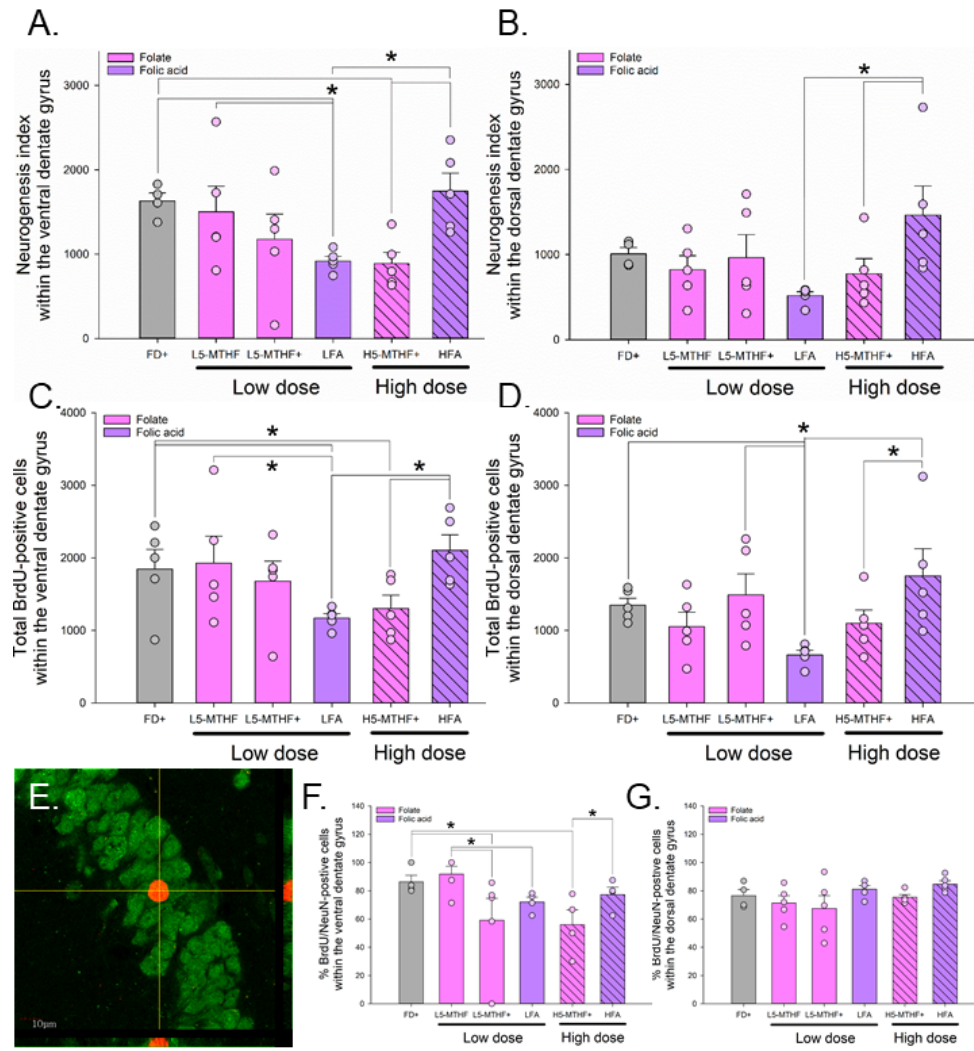

963

964

Figure 4

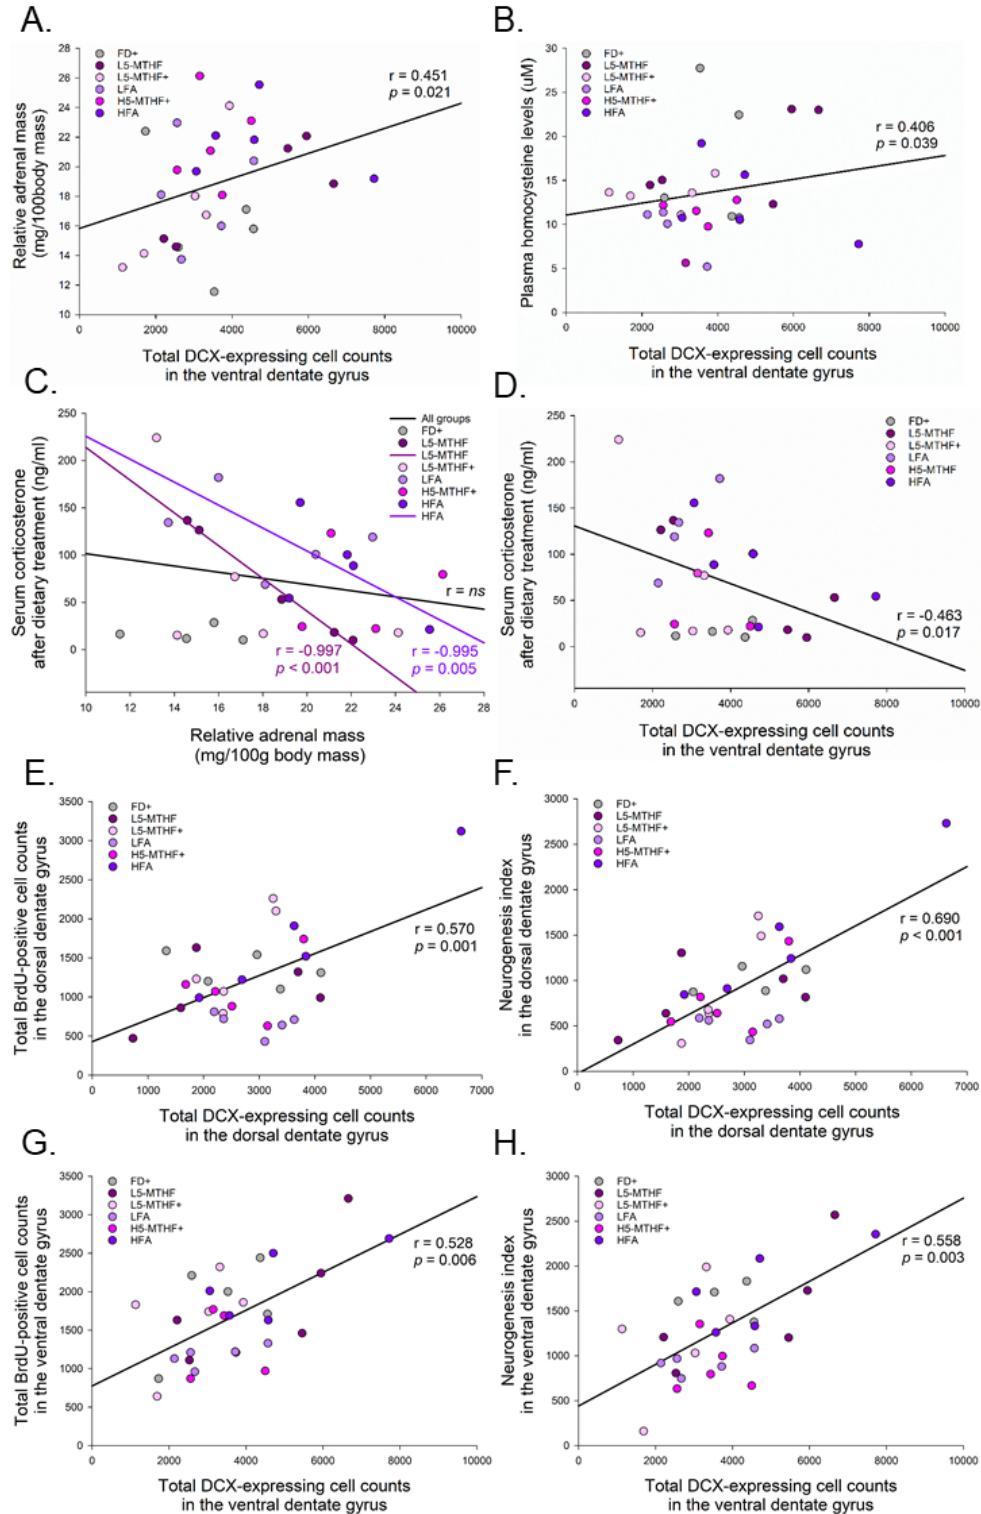

965

966

967

Figure 5
